# Supplementary material for: Formation and reactivity of NHC-boryl radicals: insight into substituent effect from theoretical calculations
Source: Royal Society of Chemistry journal article supplement (doi:10.1039/d3cp01037f), 2023-01-01
Supplement: d3cp01037f1.pdf [file d3cp01037f1.pdf]

## Electronic Supplementary Information

### Formation and Reactivity of NHC-Boryl Radicals: Insight into Substituent Effect from Theoretical Calculations

Lin Zhang and Zexing Cao\*

---

*State Key Laboratory of Physical Chemistry of Solid Surfaces and Fujian Provincial  
Key Laboratory of Theoretical and Computational Chemistry, College of Chemistry  
and Chemical Engineering, Xiamen University, Xiamen, China, 361005*

Email: [zxcao@xmu.edu.cn](mailto:zxcao@xmu.edu.cn)

## Contents

|                                                                                                                                                                                                                                                                                                                                                                           |    |
|---------------------------------------------------------------------------------------------------------------------------------------------------------------------------------------------------------------------------------------------------------------------------------------------------------------------------------------------------------------------------|----|
| <b>Figure S1.</b> Computed $\Delta G^{\text{TS}}$ , $\Delta G^{\text{R}}$ , $\Delta H^{\text{TS}}$ and $\Delta H^{\text{R}}$ of the HAA reaction for the bulky adamantyl substituted NHC-boranes at the M06-2X/cc-PVTZ/SMD//B3LYP-D3(BJ)/6-31++G(d,p)/SMD level, and the geometric of the transition state of the HAA reaction and the spin density of boryl radical..... | 3  |
| <b>Figure S2.</b> Correlations between the B–H BDE of the NHC-boranes and the spin density of the B site of their corresponding NHC-boryl radicals for the C-, N-, B-site substitutions predicted at the M06-2X/cc-PVTZ/SMD level. ....                                                                                                                                   | 4  |
| <b>Figure S3.</b> Correlations among the indices of electrophilicity and nucleophilicity, as well as between the indice and the spin density of the B atom for the NHC-boryl radicals calculated at the M06-2X/cc-PVTZ/SMD level. ....                                                                                                                                    | 5  |
| <b>Figure S4.</b> Correlations between the Hirshfeld charge (a.u.) of the B center and indices of $\omega$ , $\omega_{\text{B}}$ , $N$ and $N_{\text{B}}$ for the studied NHC-boryl radicals.....                                                                                                                                                                         | 6  |
| <b>Figure S5.</b> The effect of different solvents on the B–H bond dissociation energy of the selected NHC-boranes <b>1–21</b> . The BDE values of selected NHC-boranes in DMSO are in ascending order.....                                                                                                                                                               | 7  |
| <b>Table S1.</b> Hirshfeld charges (a.u.) of the B atom for studied NHC-boryl radicals calculated at the M06-2X/cc-PVTZ level. ....                                                                                                                                                                                                                                       | 8  |
| <b>Table S2.</b> The calculated absolute electronic energies ( $E$ , in a.u.), thermal free energies ( $G$ , in a.u.) calculated at the M06-2X/cc-PVTZ/SMD//B3LYP-D3(BJ)/6-31++G(d,p)/SMD level.....                                                                                                                                                                      | 9  |
| <b>Table S3.</b> The predicted B–H bond dissociation energies (kcal/mol) of the selected NHC-boranes <b>1–21</b> in different solvents at the M06-2X/cc-PVTZ/SMD level. ....                                                                                                                                                                                              | 14 |
| <b>Table S4.</b> The calculated absolute electronic energies ( $E$ , in a.u.), thermal free energies ( $G$ , in a.u.) calculated at the G4(MP2)-6X level. ....                                                                                                                                                                                                            | 15 |
| <b>Table S5.</b> The one-electron energies of the frontier molecular orbitals $\alpha$ -HOMO and $\beta$ -LUMO of all the studied radicals at the M06-2X/cc-PVTZ level. ....                                                                                                                                                                                              | 18 |
| <b>Table S6.</b> Cartesian coordinates of all the studied molecules. ....                                                                                                                                                                                                                                                                                                 | 20 |

(a)  $R^2 = \text{adamantane group}$

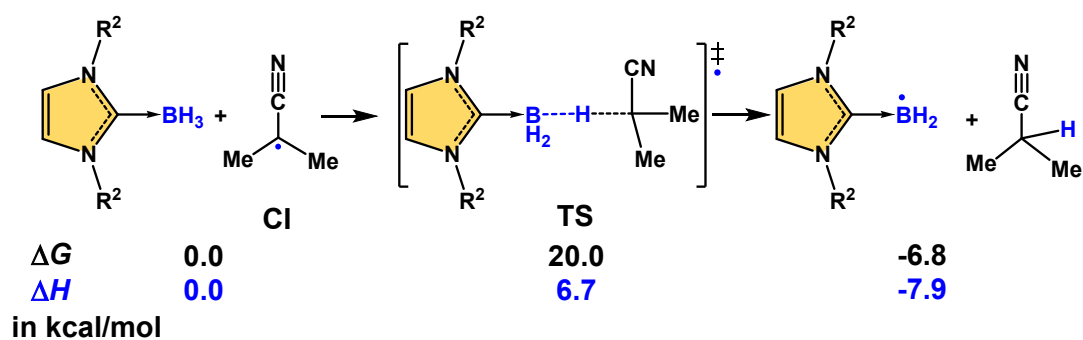

(b)

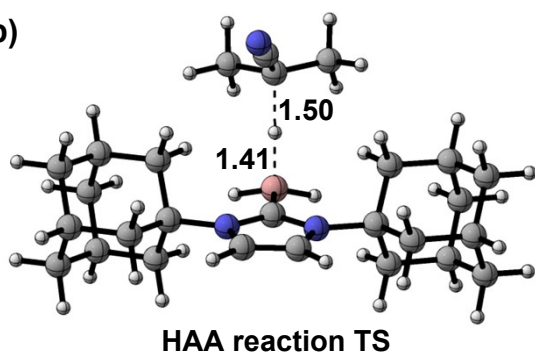

(c)

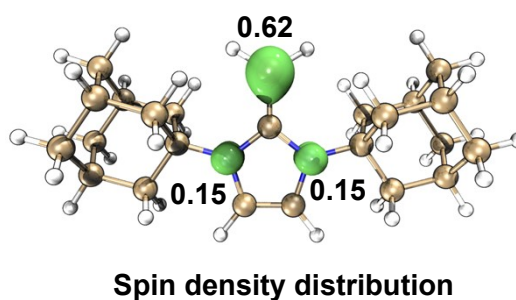

**Figure S1.** (a) Computed  $\Delta G^{\text{TS}}$ ,  $\Delta G^{\text{R}}$ ,  $\Delta H^{\text{TS}}$  and  $\Delta H^{\text{R}}$  (in kcal/mol) of the HAA reaction for the bulky adamantly substituted NHC-borane at the M06-2X/cc-PVTZ/SMD//B3LYP-D3(BJ)/6-31++G(d,p)/SMD level, (b) the transition-state structure of the HAA reaction and selected bond lengths (in Å), (c) the spin density (in a.u.) of the corresponding boryl radical.

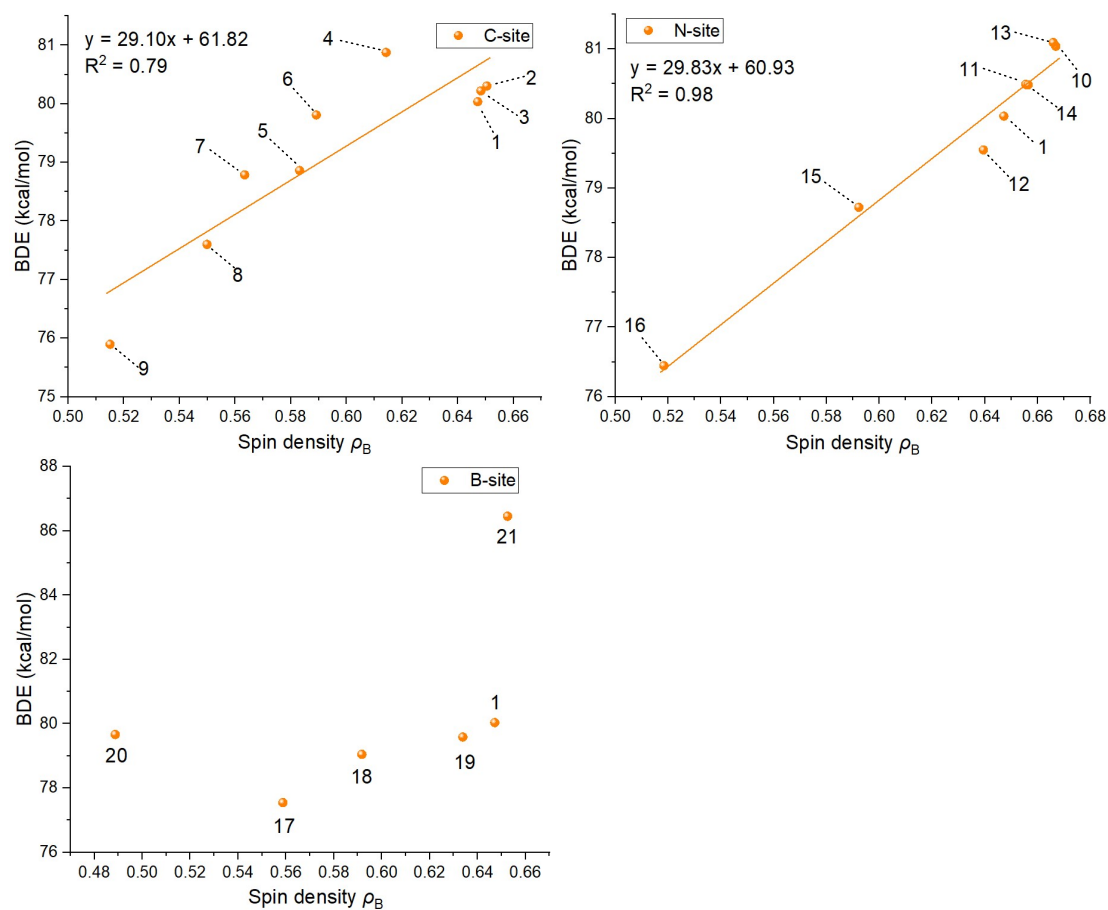

**Figure S2.** Correlations between the B–H BDE of the NHC-boranes and the spin density of the B site of their corresponding NHC-boryl radicals for the C-, N-, B-site substitutions predicted at the M06-2X/cc-PVTZ/SMD level.

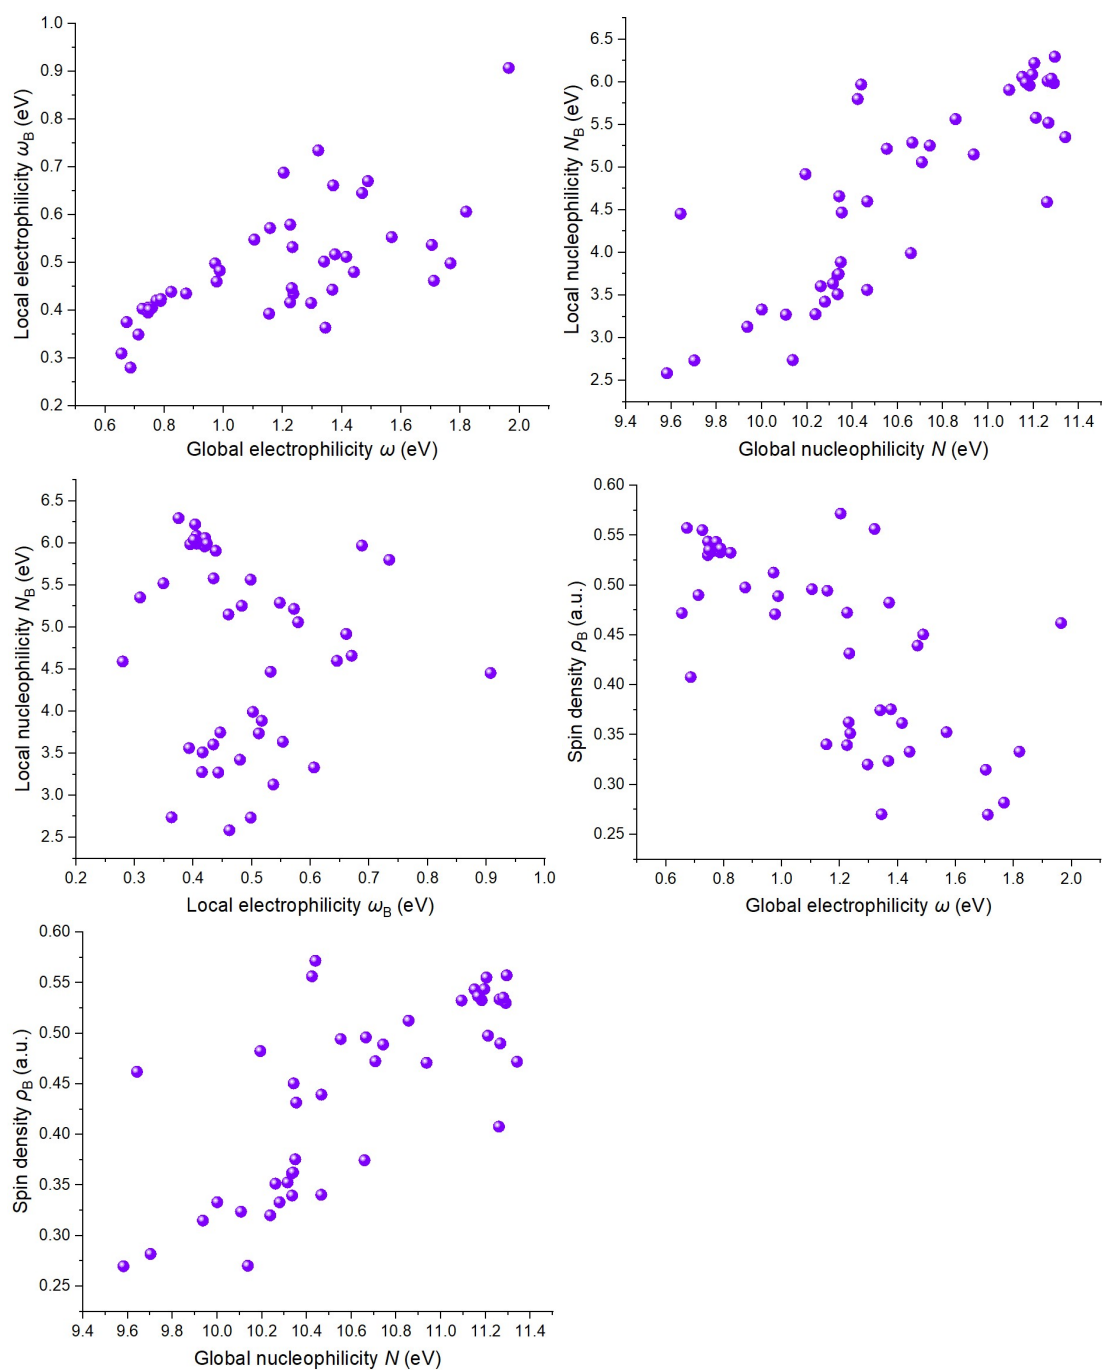

**Figure S3.** Correlations among the indices of electrophilicity and nucleophilicity, as well as between the indice and the spin density of the B atom for the NHC-boryl radicals calculated at the M06-2X/cc-PVTZ/SMD level.

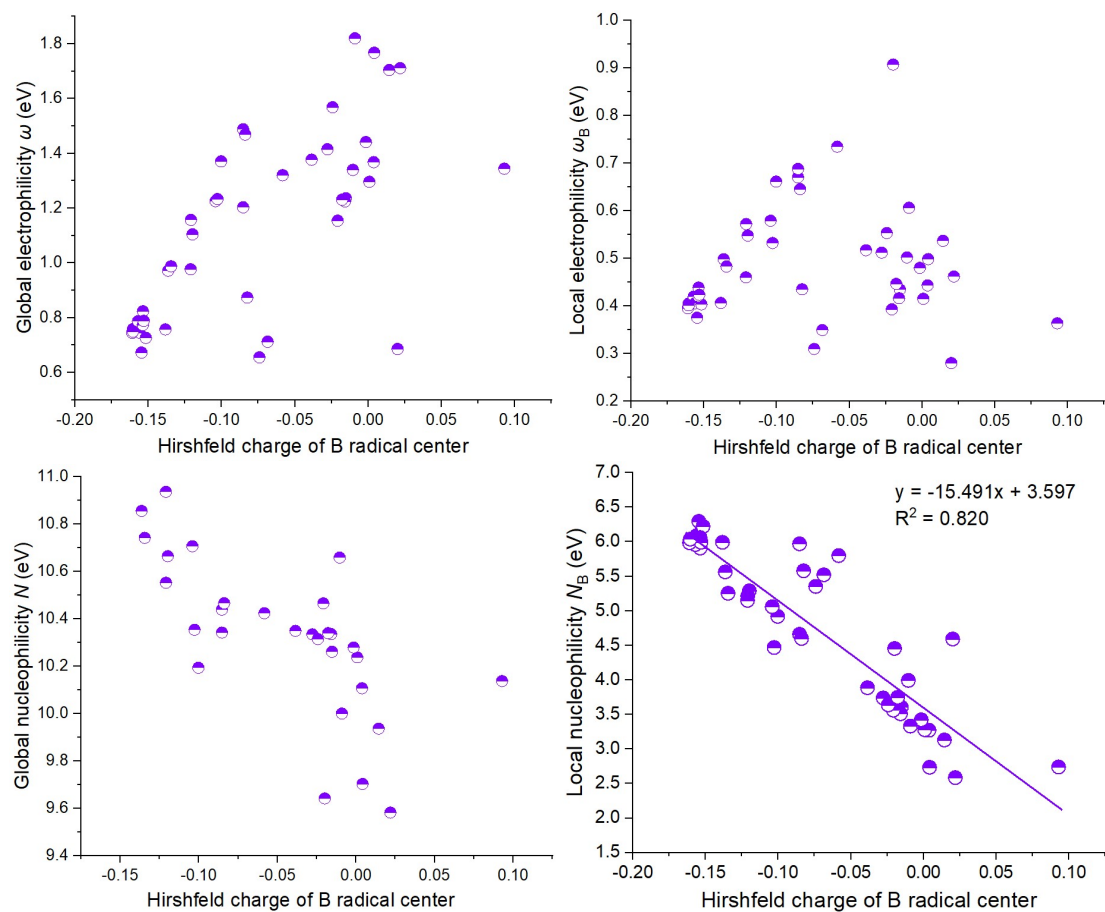

**Figure S4.** Correlations between the Hirshfeld charge (a.u.) of the B center and indices of  $\omega$ ,  $\omega_B$ ,  $N$  and  $N_B$  for the studied NHC-boryl radicals.

Generally, the solvent effect can affect the bond dissociation energy notably. Herein the B–H bond dissociation energies of the single-site-modified NHC-boranes (**1–21**) were calculated in organic solvents with different static dielectric constants ( $\epsilon$ ) covering the range from non-polarity to strong-polarity, such as dimethyl sulfoxide (DMSO,  $\epsilon = 46.83$ ), *N,N*-dimethylformamide (DMF,  $\epsilon=37.22$ ), acetonitrile ( $\epsilon=35.69$ ), tetrahydrofuran (THF,  $\epsilon=7.43$ ), and toluene ( $\epsilon=2.37$ ). As shown in Figure S5, the B–H BDE values for the discussed NHC-boranes generally increase with the increasing solvent polarity. However, the differences of the BDEs for the selected NHC-boranes are small, which suggests that the solvent effect on the B–H BDEs is less notable. Solvents may have remarkably influence on the subsequent reactions involving the NHC-boryl radicals after the B–H bond homolytic cleavage.

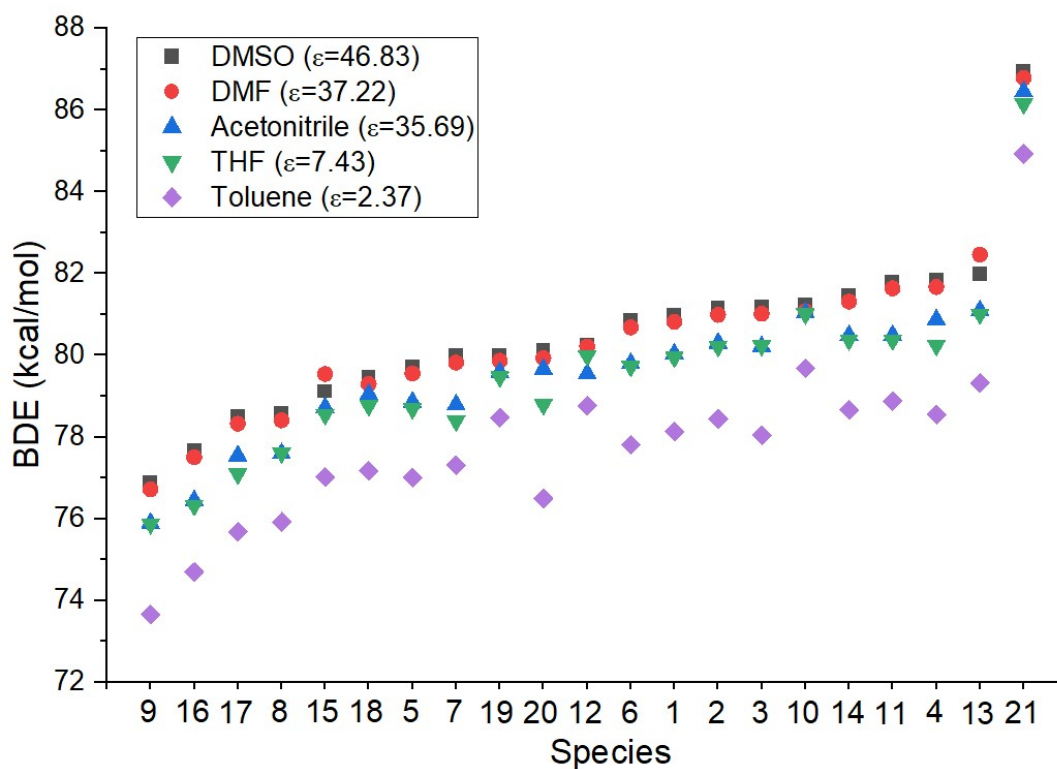

**Figure S5.** The effect of different solvents on the B–H bond dissociation energy of the selected NHC-boranes **1–21**. The BDE values of selected NHC-boranes in DMSO are in ascending order.

**Table S1.** Hirshfeld charges (a.u.) of the B atom for studied NHC-boryl radicals calculated at the M06-2X/cc-PVTZ level.

| Radicals   | Hirshfeld Charge | Radicals   | Hirshfeld Charge | Radicals   | Hirshfeld Charge |
|------------|------------------|------------|------------------|------------|------------------|
| <b>1'</b>  | -0.15363         | <b>16'</b> | -0.10276         | <b>31'</b> | -0.01988         |
| <b>2'</b>  | -0.16047         | <b>17'</b> | -0.07416         | <b>32'</b> | -0.02081         |
| <b>3'</b>  | -0.15700         | <b>18'</b> | -0.08252         | <b>33'</b> | 0.021883         |
| <b>4'</b>  | -0.13642         | <b>19'</b> | -0.05835         | <b>34'</b> | 0.004139         |
| <b>5'</b>  | -0.11979         | <b>20'</b> | 0.020049         | <b>35'</b> | -0.024279        |
| <b>6'</b>  | -0.12094         | <b>21'</b> | -0.08529         | <b>36'</b> | -0.038578        |
| <b>7'</b>  | -0.10032         | <b>22'</b> | 0.00381          | <b>37'</b> | -0.017747        |
| <b>8'</b>  | -0.10411         | <b>23'</b> | 0.000812         | <b>38'</b> | -0.160978        |
| <b>9'</b>  | -0.08533         | <b>24'</b> | -0.00153         | <b>39'</b> | -0.153104        |
| <b>10'</b> | -0.15464         | <b>25'</b> | 0.014377         | <b>40'</b> | -0.160433        |
| <b>11'</b> | -0.15606         | <b>26'</b> | -0.01525         | <b>41'</b> | -0.083886        |
| <b>12'</b> | -0.13835         | <b>27'</b> | -0.02777         | <b>42'</b> | -0.121032        |
| <b>13'</b> | -0.15164         | <b>28'</b> | -0.01582         | <b>43'</b> | -0.06859         |
| <b>14'</b> | -0.15375         | <b>29'</b> | 0.092948         | <b>44'</b> | -0.010401        |
| <b>15'</b> | -0.13445         | <b>30'</b> | -0.00900         |            |                  |



**Table S2.** The calculated absolute electronic energies ( $E$ , in a.u.), thermal free energies ( $G$ , in a.u.) calculated at the M06-2X/cc-PVTZ/SMD//B3LYP-D3(BJ)/6-31++G(d,p)/SMD level.

| <b>Boranes</b> | <b><math>E</math></b> | <b><math>G_{\text{corr}}</math></b> | <b><math>G</math></b> | <b><math>H</math></b> |
|----------------|-----------------------|-------------------------------------|-----------------------|-----------------------|
| <b>1</b>       | -331.4510363          | 0.169332                            | -331.2817043          | -331.4510363          |
| <b>2</b>       | -410.071              | 0.227943                            | -409.843057           | -410.071              |
| <b>3</b>       | -370.7604091          | 0.19763                             | -370.5627791          | -370.7604091          |
| <b>4</b>       | -791.0412109          | 0.158013                            | -790.8831979          | -791.0412109          |
| <b>5</b>       | -1250.6317            | 0.152926                            | -1250.478774          | -1250.6317            |
| <b>6</b>       | -668.4943631          | 0.17532                             | -668.3190431          | -668.4943631          |
| <b>7</b>       | -1005.524481          | 0.182241                            | -1005.34224           | -1005.524481          |
| <b>8</b>       | -485.077611           | 0.218897                            | -484.858714           | -485.077611           |
| <b>9</b>       | -501.1155611          | 0.20721                             | -500.9083511          | -501.1155611          |
| <b>10</b>      | -722.0976855          | 0.423478                            | -721.6742075          | -722.0976855          |
| <b>11</b>      | -526.7747643          | 0.296248                            | -526.4785163          | -526.7747643          |
| <b>12</b>      | -449.3664314          | 0.258866                            | -449.1075654          | -449.3664314          |
| <b>13</b>      | -488.6789276          | 0.28711                             | -488.3918176          | -488.6789276          |
| <b>14</b>      | -410.064826           | 0.228121                            | -409.836705           | -410.064826           |
| <b>15</b>      | -751.6936484          | 0.129494                            | -751.5641544          | -751.6936484          |
| <b>16</b>      | -629.1823979          | 0.146249                            | -629.0361489          | -629.1823979          |
| <b>17</b>      | -370.7569384          | 0.199456                            | -370.5574824          | -370.7569384          |
| <b>18</b>      | -562.4795654          | 0.256625                            | -562.2229404          | -562.4795654          |
| <b>19</b>      | -423.7310196          | 0.172406                            | -423.5586136          | -423.7310196          |
| <b>20</b>      | -430.7552445          | 0.164589                            | -430.5906555          | -430.7552445          |
| <b>21</b>      | -668.5294217          | 0.179468                            | -668.3499537          | -668.5294217          |
| <b>22</b>      | -1044.839779          | 0.214899                            | -1044.62488           | -1044.839779          |
| <b>23</b>      | -1128.068377          | 0.167155                            | -1127.901222          | -1128.068377          |
| <b>24</b>      | -822.1177331          | 0.227243                            | -821.8904901          | -822.1177331          |
| <b>25</b>      | -838.1543186          | 0.215504                            | -837.9388146          | -838.1543186          |

|    |              |          |              |              |
|----|--------------|----------|--------------|--------------|
| 26 | -1044.840359 | 0.21512  | -1044.625239 | -1044.840359 |
| 27 | -1319.787904 | 0.224212 | -1319.563692 | -1319.787904 |
| 28 | -1128.08193  | 0.169244 | -1127.912686 | -1128.08193  |
| 29 | -1188.067982 | 0.132204 | -1187.935778 | -1188.067982 |
| 30 | -1029.872723 | 0.27262  | -1029.600103 | -1029.872723 |
| 31 | -1181.037587 | 0.139782 | -1180.897805 | -1181.037587 |
| 32 | -1167.392145 | 0.198878 | -1167.193267 | -1167.392145 |
| 33 | -1425.904252 | 0.147078 | -1425.757174 | -1425.904252 |
| 34 | -1617.640958 | 0.204263 | -1617.436695 | -1617.640958 |
| 35 | -1013.935272 | 0.28434  | -1013.650932 | -1013.935272 |
| 36 | -1319.894423 | 0.226426 | -1319.667997 | -1319.894423 |
| 37 | -1167.455491 | 0.199059 | -1167.256432 | -1167.455491 |
| 38 | -487.5290694 | 0.26617  | -487.2628994 | -487.5290694 |
| 39 | -410.1025842 | 0.226806 | -409.8757782 | -410.1025842 |
| 40 | -488.7253284 | 0.287122 | -488.4382064 | -488.7253284 |
| 41 | -501.1713726 | 0.207028 | -500.9643446 | -501.1713726 |
| 42 | -714.9453403 | 0.280258 | -714.6650823 | -714.9453403 |
| 43 | -410.1012271 | 0.22933  | -409.8718971 | -410.1012271 |
| 44 | -579.7890005 | 0.267219 | -579.5217815 | -579.7890005 |

adamantyl  
substituted

|              |          |              |              |
|--------------|----------|--------------|--------------|
| -1031.856245 | 0.503827 | -1031.352418 | -1031.284969 |
|--------------|----------|--------------|--------------|

---

| Radicals | <i>E</i>     | <i>G</i> corr | <i>G</i>     | <i>H</i>     |
|----------|--------------|---------------|--------------|--------------|
| 1'       | -330.817629  | 0.158856      | -330.658773  | -330.817629  |
| 2'       | -409.4371046 | 0.217406      | -409.2196986 | -409.4371046 |
| 3'       | -370.1276031 | 0.18805       | -369.9395531 | -370.1276031 |
| 4'       | -790.4094586 | 0.150532      | -790.2589266 | -790.4094586 |
| 5'       | -1249.99999  | 0.142277      | -1249.857713 | -1249.99999  |
| 6'       | -667.8632757 | 0.166803      | -667.6964727 | -667.8632757 |

---

|            |              |          |              |              |
|------------|--------------|----------|--------------|--------------|
| <b>7'</b>  | -1004.896138 | 0.174843 | -1004.721295 | -1004.896138 |
| <b>8'</b>  | -484.4483448 | 0.208684 | -484.2396608 | -484.4483448 |
| <b>9'</b>  | -500.4889555 | 0.196939 | -500.2920165 | -500.4889555 |
| <b>10'</b> | -721.4623565 | 0.412682 | -721.0496745 | -721.4623565 |
| <b>11'</b> | -526.1395717 | 0.284712 | -525.8548597 | -526.1395717 |
| <b>12'</b> | -448.7323341 | 0.246925 | -448.4854091 | -448.7323341 |
| <b>13'</b> | -488.04366   | 0.27646  | -487.7672    | -488.04366   |
| <b>14'</b> | -409.4306006 | 0.217542 | -409.2130586 | -409.4306006 |
| <b>15'</b> | -751.0624467 | 0.119133 | -750.9433137 | -751.0624467 |
| <b>16'</b> | -628.5554938 | 0.136553 | -628.4189408 | -628.5554938 |
| <b>17'</b> | -370.1263778 | 0.18786  | -369.9385178 | -370.1263778 |
| <b>18'</b> | -561.8478206 | 0.246237 | -561.6015836 | -561.8478206 |
| <b>19'</b> | -423.0982028 | 0.161805 | -422.9363978 | -423.0982028 |
| <b>20'</b> | -430.122103  | 0.15379  | -429.968313  | -430.122103  |
| <b>21'</b> | -667.8852167 | 0.168425 | -667.7167917 | -667.8852167 |
| <b>22'</b> | -1044.21627  | 0.203979 | -1044.012291 | -1044.21627  |
| <b>23'</b> | -1127.448413 | 0.158528 | -1127.289885 | -1127.448413 |
| <b>24'</b> | -821.4962447 | 0.216711 | -821.2795337 | -821.4962447 |
| <b>25'</b> | -837.5363692 | 0.204999 | -837.3313702 | -837.5363692 |
| <b>26'</b> | -1044.215159 | 0.204439 | -1044.01072  | -1044.215159 |
| <b>27'</b> | -1319.167213 | 0.215742 | -1318.951471 | -1319.167213 |
| <b>28'</b> | -1127.456731 | 0.158489 | -1127.298242 | -1127.456731 |
| <b>29'</b> | -1187.445107 | 0.123559 | -1187.321548 | -1187.445107 |
| <b>30'</b> | -1029.253303 | 0.262346 | -1028.990957 | -1029.253303 |
| <b>31'</b> | -1180.411244 | 0.13098  | -1180.280264 | -1180.411244 |
| <b>32'</b> | -1166.765883 | 0.188146 | -1166.577737 | -1166.765883 |
| <b>33'</b> | -1425.286545 | 0.136408 | -1425.150137 | -1425.286545 |
| <b>34'</b> | -1617.017903 | 0.193452 | -1616.824451 | -1617.017903 |
| <b>35'</b> | -1013.311602 | 0.274015 | -1013.037587 | -1013.311602 |

|                                  |              |          |              |              |
|----------------------------------|--------------|----------|--------------|--------------|
| <b>36'</b>                       | -1319.267135 | 0.215831 | -1319.051304 | -1319.267135 |
| <b>37'</b>                       | -1166.828855 | 0.188867 | -1166.639988 | -1166.828855 |
| <b>38'</b>                       | -486.894907  | 0.255767 | -486.63914   | -486.894907  |
| <b>39'</b>                       | -409.4681411 | 0.218156 | -409.2499851 | -409.4681411 |
| <b>40'</b>                       | -488.0910519 | 0.277548 | -487.8135039 | -488.0910519 |
| <b>41'</b>                       | -500.5434864 | 0.195753 | -500.3477334 | -500.5434864 |
| <b>42'</b>                       | -714.3110945 | 0.269765 | -714.0413295 | -714.3110945 |
| <b>43'</b>                       | -409.4672679 | 0.219106 | -409.2481619 | -409.4672679 |
| <b>44'</b>                       | -579.1640253 | 0.256866 | -578.9071593 | -579.1640253 |
| <b>adamantyl<br/>substituted</b> | -1031.221911 | 0.492997 | -1030.728914 | -1030.660773 |

---

| Compounds   | <i>E</i>     | <i>G</i> <sub>corr</sub> | <i>G</i>     |
|-------------|--------------|--------------------------|--------------|
| <b>TS1</b>  | -542.1902439 | 0.263624                 | -541.9266199 |
| <b>TS2</b>  | -620.8177018 | 0.322427                 | -620.4952748 |
| <b>TS3</b>  | -581.5042865 | 0.293156                 | -581.2111305 |
| <b>TS4</b>  | -1001.791743 | 0.255502                 | -1001.536241 |
| <b>TS5</b>  | -1461.390679 | 0.247331                 | -1461.143348 |
| <b>TS6</b>  | -879.2654794 | 0.271618                 | -878.9938614 |
| <b>TS7</b>  | -1216.328423 | 0.279711                 | -1216.048712 |
| <b>TS8</b>  | -695.8329586 | 0.313225                 | -695.5197336 |
| <b>TS9</b>  | -711.8717109 | 0.301507                 | -711.5702039 |
| <b>TS10</b> | -932.8724151 | 0.517732                 | -932.3546831 |
| <b>TS11</b> | -737.5314521 | 0.390754                 | -737.1406981 |
| <b>TS12</b> | -660.1169515 | 0.352035                 | -659.7649165 |
| <b>TS13</b> | -699.4323618 | 0.381701                 | -699.0506608 |
| <b>TS14</b> | -620.811828  | 0.322843                 | -620.488985  |
| <b>TS15</b> | -962.4412761 | 0.22489                  | -962.2163861 |
| <b>TS16</b> | -839.9531594 | 0.241258                 | -839.7119014 |

---

|             |              |          |              |
|-------------|--------------|----------|--------------|
| <b>TS17</b> | -581.5027403 | 0.293826 | -581.2089143 |
| <b>TS18</b> | -773.2421774 | 0.350664 | -772.8915134 |
| <b>TS19</b> | -634.4762449 | 0.266325 | -634.2099199 |
| <b>TS20</b> | -641.5017697 | 0.259019 | -641.2427507 |
| <b>TS21</b> | -879.2907716 | 0.273516 | -879.0172556 |
| <b>TS22</b> | -1255.646582 | 0.30887  | -1255.337712 |
| <b>TS23</b> | -1338.85717  | 0.263199 | -1338.593971 |
| <b>TS24</b> | -1032.905621 | 0.321355 | -1032.584266 |
| <b>TS25</b> | -1048.943588 | 0.309682 | -1048.633906 |
| <b>TS26</b> | -1255.647614 | 0.309486 | -1255.338128 |
| <b>TS27</b> | -1530.5959   | 0.320101 | -1530.275799 |
| <b>TS28</b> | -1338.86391  | 0.263481 | -1338.600429 |
| <b>TS29</b> | -1398.855969 | 0.228203 | -1398.627766 |
| <b>TS30</b> | -1240.681997 | 0.366541 | -1240.315456 |
| <b>TS31</b> | -1391.827736 | 0.235697 | -1391.592039 |
| <b>TS32</b> | -1378.177228 | 0.293099 | -1377.884129 |
| <b>TS33</b> | -1636.612215 | 0.240909 | -1636.371306 |
| <b>TS34</b> | -1828.346998 | 0.297836 | -1828.049162 |

---

**Table S3.** The predicted B–H bond dissociation energies (kcal/mol) of the selected NHC-boranes **1–21** in different solvents at the M06-2X/cc-PVTZ/SMD level.

| Species   | DMSO     | DMF      | Acetonitrile | THF      | Toluene  |
|-----------|----------|----------|--------------|----------|----------|
| <b>1</b>  | 80.97961 | 80.81839 | 80.03579     | 79.94931 | 78.13082 |
| <b>2</b>  | 81.15017 | 80.99049 | 80.30382     | 80.21523 | 78.44274 |
| <b>3</b>  | 81.17992 | 81.01844 | 80.22072     | 80.24018 | 78.04549 |
| <b>4</b>  | 81.82554 | 81.67018 | 80.87669     | 80.24303 | 78.54716 |
| <b>5</b>  | 79.71592 | 79.55608 | 78.86172     | 78.68985 | 77.01033 |
| <b>6</b>  | 80.85182 | 80.68376 | 79.80934     | 79.72488 | 77.81047 |
| <b>7</b>  | 79.98766 | 79.82225 | 78.78892     | 78.39445 | 77.30609 |
| <b>8</b>  | 78.56058 | 78.40522 | 77.60228     | 77.60697 | 75.9215  |
| <b>9</b>  | 76.87493 | 76.71449 | 75.89629     | 75.87001 | 73.65717 |
| <b>10</b> | 81.21585 | 81.07852 | 81.04093     | 81.01279 | 79.67732 |
| <b>11</b> | 81.77726 | 81.63729 | 80.49098     | 80.37343 | 78.87382 |
| <b>12</b> | 80.24133 | 80.21391 | 79.54944     | 79.98775 | 78.76767 |
| <b>13</b> | 81.99168 | 82.46352 | 81.094       | 81.00727 | 79.3204  |
| <b>14</b> | 81.44852 | 81.31321 | 80.48453     | 80.3776  | 78.662   |
| <b>15</b> | 79.11504 | 79.54263 | 78.72395     | 78.55014 | 77.01608 |
| <b>16</b> | 77.67585 | 77.50557 | 76.44447     | 76.32201 | 74.69371 |
| <b>17</b> | 78.49439 | 78.32508 | 77.54666     | 76.09204 | 75.67786 |
| <b>18</b> | 79.44928 | 79.29512 | 79.04781     | 78.7633  | 77.16883 |
| <b>19</b> | 79.99961 | 79.86853 | 79.58684     | 79.47034 | 78.46889 |
| <b>20</b> | 80.11208 | 79.92953 | 79.66631     | 78.79309 | 76.49023 |
| <b>21</b> | 86.94107 | 86.78445 | 86.45568     | 86.15665 | 84.93203 |

**Table S4.** The calculated absolute electronic energies ( $E$ , in a.u.), thermal free energies ( $G$ , in a.u.) calculated at the G4(MP2)-6X level.

| Boranes | $G$          | $H$          |
|---------|--------------|--------------|
| 1       | -331.0017148 | -330.9620706 |
| 2       | -409.5057556 | -409.4590319 |
| 3       | -370.2542208 | -370.2102626 |
| 4       | -790.1785104 | -790.1356169 |
| 5       | -1249.355713 | -1249.309213 |
| 6       | -667.822797  | -667.7748975 |
| 7       | -1004.630845 | -1004.576921 |
| 8       | -484.4244742 | -484.3789427 |
| 9       | -500.4635497 | -500.4181297 |
| 10      | -721.0660751 | -721.003719  |
| 11      | -526.035967  | -525.9817261 |
| 12      | -448.7433418 | -448.6934949 |
| 13      | -487.9948687 | -487.943056  |
| 14      | -409.4986129 | -409.4528332 |
| 15      | -750.8896192 | -750.8486894 |
| 16      | -628.5714305 | -628.5259495 |
| 17      | -370.2499075 | -370.2068549 |
| 18      | -561.7163228 | -561.6627953 |
| 19      | -423.1852834 | -423.1416183 |
| 20      | -430.2445127 | -430.2022848 |
| 21      | -667.8503866 | -667.8022771 |
| 22      | -1043.88453  | -1043.825646 |
| 23      | -1126.98226  | -1126.930606 |
| 24      | -821.2423907 | -821.1870091 |
| 25      | -837.2794861 | -837.2247034 |
| 26      | -1043.8881   | -1043.826235 |

|           |              |              |
|-----------|--------------|--------------|
| <b>27</b> | -1318.447513 | -1318.38677  |
| <b>28</b> | -1126.997717 | -1126.946439 |
| <b>29</b> | -1186.981602 | -1186.932245 |
| <b>30</b> | -1028.74018  | -1028.679063 |
| <b>31</b> | -1179.915728 | -1179.863279 |
| <b>32</b> | -1166.246932 | -1166.191442 |
| <b>33</b> | -1424.55279  | -1424.494833 |
| <b>34</b> | -1616.011718 | -1615.948763 |

---

| Radicals   | <b>G</b>     | <b>H</b>     |
|------------|--------------|--------------|
| <b>1'</b>  | -330.3792664 | -330.3392122 |
| <b>2'</b>  | -408.8816087 | -408.8337823 |
| <b>3'</b>  | -369.6305538 | -369.586746  |
| <b>4'</b>  | -789.5565693 | -789.5131855 |
| <b>5'</b>  | -1248.734861 | -1248.68757  |
| <b>6'</b>  | -667.2029982 | -667.1549641 |
| <b>7'</b>  | -1004.016518 | -1003.959527 |
| <b>8'</b>  | -483.8060757 | -483.7597559 |
| <b>9'</b>  | -499.8463932 | -499.8005881 |
| <b>10'</b> | -720.4458065 | -720.3792884 |
| <b>11'</b> | -525.4120809 | -525.3586131 |
| <b>12'</b> | -448.1195113 | -448.0692437 |
| <b>13'</b> | -487.3709521 | -487.3168194 |
| <b>14'</b> | -408.8762524 | -408.8275324 |
| <b>15'</b> | -750.2707607 | -750.2288117 |
| <b>16'</b> | -627.9550784 | -627.9076048 |
| <b>17'</b> | -369.616722  | -369.571032  |
| <b>18'</b> | -561.066408  | -561.0121097 |
| <b>19'</b> | -422.5603968 | -422.5158651 |
| <b>20'</b> | -429.6283658 | -429.5865481 |

---



|            |              |              |
|------------|--------------|--------------|
| <b>21'</b> | -667.2165594 | -667.1642759 |
| <b>22'</b> | -1043.272745 | -1043.211846 |
| <b>23'</b> | -1126.373279 | -1126.321628 |
| <b>24'</b> | -820.6284189 | -820.5746871 |
| <b>25'</b> | -836.6698232 | -836.6138988 |
| <b>26'</b> | -1043.272458 | -1043.212947 |
| <b>27'</b> | -1317.836592 | -1317.773419 |
| <b>28'</b> | -1126.383028 | -1126.329648 |
| <b>29'</b> | -1186.3733   | -1186.32187  |
| <b>30'</b> | -1028.130868 | -1028.067485 |
| <b>31'</b> | -1179.298353 | -1179.244766 |
| <b>32'</b> | -1165.632282 | -1165.576896 |
| <b>33'</b> | -1423.947209 | -1423.890757 |
| <b>34'</b> | -1615.404394 | -1615.337801 |

---

**Table S5.** The one-electron energies of the frontier molecular orbitals  $\alpha$ -HOMO and  $\beta$ -LUMO of all the studied radicals at the M06-2X/cc-PVTZ level.

|     | $E_{\alpha\text{-HOMO}}$ | $E_{\beta\text{-LUMO}}$ | $\mu$    | $\eta$   | $\omega$ | $N$      | spin density |
|-----|--------------------------|-------------------------|----------|----------|----------|----------|--------------|
| 1'  | -4.67032                 | -0.54353                | -2.60692 | 4.126789 | 0.823406 | 11.09264 | 0.53254      |
| 2'  | -4.50011                 | -0.45424                | -2.47717 | 4.045864 | 0.758354 | 11.26285 | 0.533679     |
| 3'  | -4.58003                 | -0.49302                | -2.53653 | 4.087009 | 0.787125 | 11.18293 | 0.532859     |
| 4'  | -4.90717                 | -0.76628                | -2.83672 | 4.140898 | 0.97165  | 10.85579 | 0.512517     |
| 5'  | -5.09798                 | -0.95332                | -3.02565 | 4.14466  | 1.104381 | 10.66498 | 0.49595      |
| 6'  | -5.2103                  | -1.01876                | -3.11453 | 4.191542 | 1.157128 | 10.55266 | 0.494343     |
| 7'  | -5.56957                 | -1.28456                | -3.42706 | 4.285009 | 1.370447 | 10.19339 | 0.482493     |
| 8'  | -5.05588                 | -1.14006                | -3.09797 | 3.915819 | 1.225464 | 10.70709 | 0.472445     |
| 9'  | -5.42079                 | -1.45223                | -3.43651 | 3.968554 | 1.487895 | 10.34218 | 0.45058      |
| 10' | -4.46858                 | -0.27938                | -2.37398 | 4.189198 | 0.672656 | 11.29438 | 0.557382     |
| 11' | -4.56851                 | -0.41078                | -2.48965 | 4.157729 | 0.745401 | 11.19445 | 0.543787     |
| 12' | -4.59251                 | -0.42924                | -2.51087 | 4.163273 | 0.757154 | 11.17045 | 0.536291     |
| 13' | -4.55907                 | -0.37252                | -2.46579 | 4.186549 | 0.726152 | 11.20389 | 0.555259     |
| 14' | -4.6123                  | -0.45808                | -2.53519 | 4.154229 | 0.773571 | 11.15066 | 0.543461     |
| 15' | -5.02081                 | -0.77242                | -2.89661 | 4.248386 | 0.987478 | 10.74215 | 0.488996     |
| 16' | -5.40936                 | -1.10614                | -3.25775 | 4.30322  | 1.233135 | 10.35361 | 0.431557     |
| 17' | -4.42211                 | -0.25316                | -2.33763 | 4.168944 | 0.655385 | 11.34086 | 0.472034     |
| 18' | -4.55213                 | -0.66222                | -2.60717 | 3.889907 | 0.873717 | 11.21083 | 0.497665     |
| 19' | -5.33902                 | -1.24029                | -3.28966 | 4.098731 | 1.320145 | 10.42394 | 0.556393     |
| 20' | -4.50306                 | -0.29954                | -2.4013  | 4.203521 | 0.685881 | 11.2599  | 0.407749     |
| 21' | -5.32395                 | -1.07272                | -3.19834 | 4.251237 | 1.203103 | 10.43901 | 0.571789     |
| 22' | -5.65623                 | -1.27119                | -3.46371 | 4.385043 | 1.367979 | 10.10673 | 0.323735     |
| 23' | -5.52563                 | -1.18414                | -3.35488 | 4.341489 | 1.296243 | 10.23733 | 0.320124     |
| 24' | -5.48387                 | -1.38787                | -3.43587 | 4.095994 | 1.441068 | 10.27909 | 0.332974     |
| 25' | -5.82672                 | -1.68645                | -3.75658 | 4.140273 | 1.704226 | 9.93624  | 0.314925     |
| 26' | -5.50223                 | -1.09739                | -3.29981 | 4.404837 | 1.235998 | 10.26073 | 0.351381     |
| 27' | -5.42841                 | -1.35903                | -3.39372 | 4.069379 | 1.41512  | 10.33455 | 0.36173      |
| 28' | -5.42755                 | -1.09124                | -3.25939 | 4.336313 | 1.224961 | 10.33541 | 0.339642     |
| 29' | -5.62578                 | -1.24099                | -3.43338 | 4.384788 | 1.344205 | 10.13719 | 0.270212     |
| 30' | -5.76268                 | -1.81683                | -3.78975 | 3.94585  | 1.819915 | 10.00028 | 0.333091     |
| 31' | -6.12152                 | -1.96223                | -4.04187 | 4.159291 | 1.963883 | 9.641443 | 0.46203      |
| 32' | -5.29731                 | -1.00095                | -3.14913 | 4.296356 | 1.154118 | 10.46566 | 0.34033      |
| 33' | -6.18149                 | -1.67381                | -3.92765 | 4.507678 | 1.71113  | 9.58147  | 0.269804     |
| 34' | -6.06048                 | -1.74781                | -3.90415 | 4.312673 | 1.767158 | 9.702478 | 0.281907     |
| 35' | -5.44808                 | -1.54754                | -3.49781 | 3.900541 | 1.568331 | 10.31488 | 0.352577     |
| 36' | -5.41366                 | -1.30968                | -3.36167 | 4.103985 | 1.376812 | 10.3493  | 0.375534     |
| 37' | -5.42326                 | -1.10064                | -3.26195 | 4.322619 | 1.230769 | 10.33971 | 0.362449     |
| 38' | -4.47281                 | -0.43347                | -2.45314 | 4.03934  | 0.74491  | 11.29015 | 0.530103     |
| 39' | -4.5971                  | -0.49199                | -2.54454 | 4.105104 | 0.788616 | 11.16587 | 0.536767     |

|     |          |          |          |          |          |          |          |
|-----|----------|----------|----------|----------|----------|----------|----------|
| 40' | -4.4833  | -0.43996 | -2.46163 | 4.04334  | 0.749335 | 11.27966 | 0.535302 |
| 41' | -5.29676 | -1.43713 | -3.36694 | 3.859635 | 1.468572 | 10.4662  | 0.439415 |
| 42' | -4.82652 | -0.78981 | -2.80817 | 4.036711 | 0.976761 | 10.93644 | 0.470973 |
| 43' | -4.49711 | -0.35901 | -2.42806 | 4.138104 | 0.712341 | 11.26585 | 0.490017 |
| 44' | -5.1042  | -1.28992 | -3.19706 | 3.814274 | 1.339862 | 10.65876 | 0.374578 |

---

**Table S6.** Cartesian coordinates of all the studied molecules.

Structure-----

**1**

|   |              |              |              |
|---|--------------|--------------|--------------|
| C | 0.009649000  | 0.589902000  | -0.000088000 |
| C | -0.725915000 | -1.542463000 | 0.000061000  |
| C | 0.634541000  | -1.578900000 | 0.000008000  |
| H | -1.459558000 | -2.332961000 | 0.000104000  |
| H | 1.325784000  | -2.406822000 | -0.000034000 |
| N | -1.089546000 | -0.204431000 | -0.000010000 |
| B | 0.095468000  | 2.188127000  | 0.000040000  |
| H | 0.717942000  | 2.547822000  | 0.992563000  |
| H | 0.718193000  | 2.548037000  | -0.992276000 |
| H | -1.019284000 | 2.674010000  | -0.000041000 |
| N | 1.065145000  | -0.262712000 | -0.000103000 |
| C | 2.461753000  | 0.160927000  | 0.000038000  |
| H | 2.670378000  | 0.758175000  | -0.890129000 |
| H | 2.670606000  | 0.756992000  | 0.890952000  |
| H | 3.092170000  | -0.727960000 | -0.000631000 |
| C | -2.473490000 | 0.267567000  | -0.000002000 |
| H | -2.666987000 | 0.867037000  | 0.890965000  |
| H | -2.667053000 | 0.866873000  | -0.891067000 |
| H | -3.127950000 | -0.604031000 | 0.000082000  |

END-----

Structure-----

**2**

|   |              |              |              |
|---|--------------|--------------|--------------|
| C | 0.321057000  | 1.153033000  | -0.009992000 |
| C | -0.927093000 | -0.744412000 | 0.001232000  |
| C | 0.386900000  | -1.118151000 | -0.004680000 |
| N | -0.939846000 | 0.653889000  | -0.002901000 |
| B | 0.817414000  | 2.681780000  | 0.005615000  |
| H | 1.480825000  | 2.870466000  | 1.019437000  |
| H | 1.537017000  | 2.879328000  | -0.966695000 |
| H | -0.124533000 | 3.450113000  | -0.018439000 |
| N | 1.129256000  | 0.063777000  | -0.016458000 |
| C | 2.586345000  | 0.108107000  | 0.009527000  |
| H | 2.987981000  | -0.589330000 | -0.727977000 |
| H | 2.912639000  | 1.116485000  | -0.235112000 |
| H | 2.956544000  | -0.163389000 | 1.002363000  |
| C | -2.175326000 | 1.429762000  | -0.000954000 |
| H | -1.926889000 | 2.487597000  | -0.007822000 |
| H | -2.766318000 | 1.187325000  | -0.887698000 |
| H | -2.757516000 | 1.196899000  | 0.894150000  |
| C | 1.026569000  | -2.463181000 | -0.001257000 |

|   |              |              |              |
|---|--------------|--------------|--------------|
| H | 0.261391000  | -3.240519000 | 0.049645000  |
| H | 1.619834000  | -2.629425000 | -0.908016000 |
| H | 1.695019000  | -2.586180000 | 0.858574000  |
| C | -2.179379000 | -1.550807000 | 0.007459000  |
| H | -2.793126000 | -1.332879000 | 0.889107000  |
| H | -2.791504000 | -1.349441000 | -0.879332000 |
| H | -1.938746000 | -2.615713000 | 0.017242000  |

END-----

Structure-----

**3**

|   |              |              |              |
|---|--------------|--------------|--------------|
| C | -0.721450000 | 0.635285000  | -0.009514000 |
| C | -0.018796000 | -1.508644000 | 0.003250000  |
| C | 1.097316000  | -0.728338000 | -0.003602000 |
| N | -1.118267000 | -0.659840000 | -0.001552000 |
| B | -1.606002000 | 1.975853000  | 0.003549000  |
| H | -1.322465000 | 2.624808000  | 1.003601000  |
| H | -1.327590000 | 2.647152000  | -0.982897000 |
| H | -2.793590000 | 1.714874000  | 0.002616000  |
| N | 0.638239000  | 0.587438000  | -0.016679000 |
| C | 1.511636000  | 1.755323000  | 0.006951000  |
| H | 2.319155000  | 1.622769000  | -0.715294000 |
| H | 0.930667000  | 2.634964000  | -0.261416000 |
| H | 1.936773000  | 1.890122000  | 1.005596000  |
| C | -2.491649000 | -1.155593000 | 0.003737000  |
| H | -3.175272000 | -0.311025000 | -0.022947000 |
| H | -2.653836000 | -1.787748000 | -0.872683000 |
| H | -2.665747000 | -1.740517000 | 0.910385000  |
| C | 2.542115000  | -1.086767000 | 0.002572000  |
| H | 2.649183000  | -2.173255000 | 0.038564000  |
| H | 3.050390000  | -0.720439000 | -0.896582000 |
| H | 3.055722000  | -0.660003000 | 0.871389000  |
| H | -0.128218000 | -2.581742000 | 0.009174000  |

END-----

Structure-----

**4**

|   |              |              |              |
|---|--------------|--------------|--------------|
| C | -1.141135000 | 0.552602000  | -0.000022000 |
| C | -0.053002000 | -1.430777000 | 0.000004000  |
| C | 0.875091000  | -0.439420000 | -0.000006000 |
| N | -1.284421000 | -0.796184000 | -0.000004000 |
| B | -2.264821000 | 1.700966000  | -0.000008000 |
| H | -2.109705000 | 2.397487000  | 0.994507000  |
| H | -2.109006000 | 2.398217000  | -0.993892000 |

|    |              |              |              |
|----|--------------|--------------|--------------|
| H  | -3.377863000 | 1.215571000  | -0.000572000 |
| N  | 0.203562000  | 0.772059000  | -0.000016000 |
| C  | 0.849163000  | 2.082073000  | 0.000004000  |
| H  | 1.468008000  | 2.189632000  | -0.893500000 |
| H  | 0.074022000  | 2.843944000  | 0.000034000  |
| H  | 1.468035000  | 2.189587000  | 0.893494000  |
| C  | -2.541914000 | -1.543342000 | 0.000024000  |
| H  | -3.369983000 | -0.839918000 | 0.000102000  |
| H  | -2.588704000 | -2.171073000 | -0.892651000 |
| H  | -2.588604000 | -2.171154000 | 0.892647000  |
| Cl | 2.590719000  | -0.541852000 | -0.000002000 |
| H  | 0.052474000  | -2.503577000 | 0.000022000  |

END-----

Structure-----

**5**

|    |              |              |              |
|----|--------------|--------------|--------------|
| C  | -1.584169000 | -0.247773000 | -0.000006000 |
| C  | 0.639841000  | -0.595035000 | 0.000000000  |
| C  | 0.434423000  | 0.749891000  | 0.000004000  |
| N  | -0.609873000 | -1.196582000 | 0.000004000  |
| B  | -3.180212000 | -0.434256000 | -0.000014000 |
| H  | -3.631693000 | 0.116029000  | 0.994328000  |
| H  | -3.631717000 | 0.116521000  | -0.994059000 |
| H  | -3.475697000 | -1.610771000 | -0.000274000 |
| N  | -0.935467000 | 0.947770000  | -0.000002000 |
| C  | -1.580182000 | 2.259972000  | 0.000031000  |
| H  | -1.287619000 | 2.813988000  | -0.894274000 |
| H  | -2.655985000 | 2.107416000  | 0.000076000  |
| H  | -1.287559000 | 2.813963000  | 0.894334000  |
| C  | -0.803519000 | -2.647006000 | -0.000020000 |
| H  | -1.871138000 | -2.845607000 | 0.000065000  |
| H  | -0.347143000 | -3.076492000 | -0.893992000 |
| H  | -0.346990000 | -3.076539000 | 0.893850000  |
| Cl | 1.573837000  | 2.025017000  | -0.000023000 |
| Cl | 2.109435000  | -1.470066000 | 0.000019000  |

END-----

Structure-----

**6**

|   |              |              |              |
|---|--------------|--------------|--------------|
| C | 1.711550000  | 0.469465000  | 0.000064000  |
| C | 0.403529000  | -1.363948000 | -0.000081000 |
| C | -0.410135000 | -0.270646000 | -0.000011000 |
| N | 1.694790000  | -0.890563000 | 0.000006000  |
| B | 2.973298000  | 1.450467000  | 0.000148000  |

|   |              |              |              |
|---|--------------|--------------|--------------|
| H | 2.906005000  | 2.164092000  | -0.992104000 |
| H | 2.906082000  | 2.163813000  | 0.992607000  |
| H | 4.003932000  | 0.808526000  | 0.000024000  |
| N | 0.411842000  | 0.851402000  | 0.000012000  |
| C | -0.003120000 | 2.255995000  | 0.000007000  |
| H | 0.390530000  | 2.747434000  | 0.891195000  |
| H | 0.390120000  | 2.747338000  | -0.891418000 |
| H | -1.087840000 | 2.323267000  | 0.000259000  |
| C | 2.881010000  | -1.749830000 | 0.000043000  |
| H | 3.478422000  | -1.556872000 | -0.891706000 |
| H | 3.478184000  | -1.557137000 | 0.892012000  |
| H | 2.544755000  | -2.786020000 | -0.000157000 |
| C | -1.892089000 | -0.239326000 | -0.000037000 |
| F | -2.409123000 | 0.400255000  | 1.086640000  |
| F | -2.409059000 | 0.400554000  | -1.086566000 |
| F | -2.397301000 | -1.492568000 | -0.000223000 |
| H | 0.171774000  | -2.417083000 | -0.000146000 |

END-----

Structure-----

**7**

|   |              |              |              |
|---|--------------|--------------|--------------|
| C | -0.086914000 | 2.089489000  | 0.000009000  |
| C | 0.693161000  | -0.024366000 | 0.000005000  |
| C | -0.679402000 | -0.085674000 | -0.000012000 |
| N | 1.029480000  | 1.323233000  | 0.000013000  |
| B | -0.207012000 | 3.682978000  | 0.000017000  |
| H | -0.844415000 | 4.007581000  | -0.990980000 |
| H | -0.844446000 | 4.007570000  | 0.990997000  |
| H | 0.889764000  | 4.196203000  | 0.000040000  |
| N | -1.131025000 | 1.225668000  | -0.000002000 |
| C | -2.520772000 | 1.703317000  | 0.000012000  |
| H | -2.681594000 | 2.310222000  | 0.891696000  |
| H | -2.681721000 | 2.309977000  | -0.891816000 |
| H | -3.211498000 | 0.867474000  | 0.000181000  |
| C | 2.383423000  | 1.902518000  | 0.000018000  |
| H | 2.505058000  | 2.515496000  | -0.892445000 |
| H | 2.505231000  | 2.515138000  | 0.892707000  |
| H | 3.128651000  | 1.115079000  | -0.000221000 |
| C | -1.672091000 | -1.211065000 | -0.000113000 |
| C | 1.777615000  | -1.062310000 | 0.000098000  |
| F | -2.482851000 | -1.139809000 | 1.090154000  |
| F | -2.483378000 | -1.139111000 | -1.089942000 |
| F | -1.123247000 | -2.431457000 | -0.000650000 |
| F | 1.331036000  | -2.323723000 | 0.000598000  |

|   |             |              |              |
|---|-------------|--------------|--------------|
| F | 2.580033000 | -0.925570000 | 1.090299000  |
| F | 2.579599000 | -0.926263000 | -1.090508000 |

END-----

Structure-----

**8**

|   |              |              |              |
|---|--------------|--------------|--------------|
| C | -0.491033000 | -0.706803000 | -0.006434000 |
| C | -0.516954000 | 0.696056000  | -0.002377000 |
| C | -1.716487000 | 1.408152000  | 0.001996000  |
| C | -2.893825000 | 0.656292000  | 0.004555000  |
| C | -2.867917000 | -0.752633000 | 0.003111000  |
| C | -1.664408000 | -1.461689000 | -0.001927000 |
| C | 1.644730000  | 0.036805000  | -0.005669000 |
| H | -1.733910000 | 2.492428000  | 0.004001000  |
| H | -3.850203000 | 1.169582000  | 0.008744000  |
| H | -3.804966000 | -1.300501000 | 0.006962000  |
| H | -1.642433000 | -2.545884000 | -0.000807000 |
| C | 1.193836000  | 2.520229000  | -0.000477000 |
| H | 0.793531000  | 3.007547000  | -0.893296000 |
| H | 0.788404000  | 3.006557000  | 0.890524000  |
| H | 2.277752000  | 2.594456000  | 0.002666000  |
| C | 1.317906000  | -2.449638000 | 0.005987000  |
| H | 1.139574000  | -2.890776000 | 0.990853000  |
| H | 0.777468000  | -3.021961000 | -0.751258000 |
| H | 2.382112000  | -2.468813000 | -0.216533000 |
| N | 0.812800000  | 1.112582000  | -0.002070000 |
| N | 0.852142000  | -1.068932000 | -0.014346000 |
| B | 3.247628000  | 0.008966000  | 0.008396000  |
| H | 3.607576000  | -0.593948000 | 1.010341000  |
| H | 3.629405000  | -0.611581000 | -0.974230000 |
| H | 3.707874000  | 1.131894000  | 0.002384000  |

END-----

Structure-----

**9**

|   |              |              |              |
|---|--------------|--------------|--------------|
| C | -0.494428000 | -0.704572000 | -0.009478000 |
| C | -0.528591000 | 0.696620000  | -0.002724000 |
| C | -1.747710000 | 1.369641000  | 0.003461000  |
| C | -2.881732000 | 0.556775000  | 0.006318000  |
| C | -1.682380000 | -1.432584000 | -0.002929000 |
| C | 1.630550000  | 0.047801000  | -0.008290000 |
| H | -1.824586000 | 2.450461000  | 0.007191000  |
| H | -3.867000000 | 1.013982000  | 0.011894000  |
| H | -1.691009000 | -2.518332000 | -0.001672000 |



|   |              |              |              |
|---|--------------|--------------|--------------|
| C | 1.165642000  | 2.534271000  | 0.000063000  |
| H | 0.763743000  | 3.018478000  | -0.893241000 |
| H | 0.758167000  | 3.016219000  | 0.892034000  |
| H | 2.249350000  | 2.610314000  | 0.003584000  |
| C | 1.334601000  | -2.438014000 | 0.010513000  |
| H | 1.351614000  | -2.807637000 | 1.039453000  |
| H | 0.671419000  | -3.061198000 | -0.591143000 |
| H | 2.338556000  | -2.468944000 | -0.407711000 |
| N | 0.789916000  | 1.123210000  | -0.002520000 |
| N | 0.848212000  | -1.062718000 | -0.021298000 |
| B | 3.230637000  | 0.027000000  | 0.010050000  |
| H | 3.582605000  | -0.591796000 | 1.004212000  |
| H | 3.610625000  | -0.584049000 | -0.978464000 |
| H | 3.688084000  | 1.149923000  | 0.019526000  |
| N | -2.861052000 | -0.795071000 | 0.004173000  |

END-----

Structure-----

**10**

|   |              |              |              |
|---|--------------|--------------|--------------|
| C | -0.003160000 | -0.153787000 | 0.552249000  |
| C | 0.691154000  | 0.432389000  | -1.514073000 |
| C | -0.667032000 | 0.423701000  | -1.527429000 |
| H | 1.402896000  | 0.653951000  | -2.292244000 |
| H | -1.366881000 | 0.640459000  | -2.317863000 |
| N | 1.083819000  | 0.079562000  | -0.229506000 |
| B | -0.071659000 | -0.597663000 | 2.097247000  |
| H | -0.696466000 | -1.647845000 | 2.178497000  |
| H | 1.042942000  | -0.747946000 | 2.557898000  |
| H | -0.670893000 | 0.261711000  | 2.732184000  |
| N | -1.076055000 | 0.061763000  | -0.253302000 |
| C | 2.492981000  | -0.025791000 | 0.187134000  |
| C | 3.170862000  | -1.245591000 | -0.474226000 |
| C | 3.266948000  | 1.263302000  | -0.103185000 |
| H | 2.457871000  | -0.170507000 | 1.265643000  |
| C | 4.705360000  | -1.079501000 | -0.531893000 |
| H | 2.774188000  | -1.375686000 | -1.486849000 |
| H | 2.901801000  | -2.143066000 | 0.094340000  |
| C | 4.653055000  | 1.201320000  | 0.578748000  |
| H | 3.383914000  | 1.379144000  | -1.186841000 |
| H | 2.699379000  | 2.128456000  | 0.254742000  |
| C | 5.212229000  | -0.239798000 | 0.646690000  |
| H | 4.988840000  | -0.583359000 | -1.468858000 |
| H | 5.183112000  | -2.065075000 | -0.542394000 |
| H | 4.582340000  | 1.613247000  | 1.591964000  |

|   |              |              |              |
|---|--------------|--------------|--------------|
| H | 5.346238000  | 1.843377000  | 0.023634000  |
| H | 4.897676000  | -0.718527000 | 1.583245000  |
| H | 6.307432000  | -0.216123000 | 0.661110000  |
| C | -2.482147000 | -0.058850000 | 0.164067000  |
| C | -3.168936000 | 1.324279000  | 0.185905000  |
| C | -3.250851000 | -1.046317000 | -0.718642000 |
| H | -2.442569000 | -0.461246000 | 1.175985000  |
| C | -4.703409000 | 1.198175000  | 0.061147000  |
| H | -2.780263000 | 1.933500000  | -0.637095000 |
| H | -2.898329000 | 1.832736000  | 1.117980000  |
| C | -4.637174000 | -1.332926000 | -0.096942000 |
| H | -3.365014000 | -0.617199000 | -1.720927000 |
| H | -2.677785000 | -1.972801000 | -0.827423000 |
| C | -5.199894000 | -0.116124000 | 0.675046000  |
| H | -4.991937000 | 1.226275000  | -0.997363000 |
| H | -5.184332000 | 2.058056000  | 0.539711000  |
| H | -4.565362000 | -2.192329000 | 0.579436000  |
| H | -5.329187000 | -1.617239000 | -0.897695000 |
| H | -4.880667000 | -0.159595000 | 1.724543000  |
| H | -6.294901000 | -0.150212000 | 0.680476000  |

END-----

Structure-----

**11**

|   |              |              |              |
|---|--------------|--------------|--------------|
| C | -1.635719000 | 0.625083000  | 0.003696000  |
| C | -1.046663000 | -1.553136000 | -0.058403000 |
| C | -2.405088000 | -1.494746000 | -0.045103000 |
| H | -0.376362000 | -2.396573000 | -0.084896000 |
| H | -3.151079000 | -2.273582000 | -0.060807000 |
| N | -0.593015000 | -0.243147000 | -0.031286000 |
| B | -1.555415000 | 2.227706000  | 0.046515000  |
| H | -2.670229000 | 2.694306000  | 0.185071000  |
| H | -0.837308000 | 2.570888000  | 0.976073000  |
| H | -1.060974000 | 2.633303000  | -0.999552000 |
| N | -2.748335000 | -0.152013000 | -0.006710000 |
| C | -4.126836000 | 0.335449000  | 0.015405000  |
| H | -4.312623000 | 0.902697000  | 0.928806000  |
| H | -4.316938000 | 0.969638000  | -0.851821000 |
| H | -4.790191000 | -0.528986000 | -0.015545000 |
| C | 0.824882000  | 0.151812000  | -0.028002000 |
| C | 1.488142000  | -0.198436000 | 1.322007000  |
| C | 1.591079000  | -0.469953000 | -1.198954000 |
| H | 0.814867000  | 1.234073000  | -0.159632000 |
| C | 3.021363000  | -0.325985000 | 1.185017000  |

|   |             |              |              |
|---|-------------|--------------|--------------|
| H | 1.070089000 | -1.140082000 | 1.693968000  |
| H | 1.228878000 | 0.578825000  | 2.049400000  |
| C | 2.993257000 | 0.173258000  | -1.302398000 |
| H | 1.680902000 | -1.550433000 | -1.036580000 |
| H | 1.031828000 | -0.327880000 | -2.129338000 |
| C | 3.553018000 | 0.591771000  | 0.077862000  |
| H | 3.286125000 | -1.363265000 | 0.943499000  |
| H | 3.497909000 | -0.096260000 | 2.144078000  |
| H | 2.947015000 | 1.050067000  | -1.958369000 |
| H | 3.673417000 | -0.542416000 | -1.777817000 |
| H | 3.258308000 | 1.625110000  | 0.302681000  |
| H | 4.648278000 | 0.577468000  | 0.057408000  |

END-----

Structure-----

**12**

|   |              |              |              |
|---|--------------|--------------|--------------|
| C | 0.852873000  | 0.525812000  | 0.000083000  |
| C | 0.243526000  | -1.646229000 | 0.000051000  |
| C | 1.600764000  | -1.605239000 | -0.000001000 |
| H | -0.415943000 | -2.494986000 | 0.000059000  |
| H | 2.335783000  | -2.394629000 | -0.000045000 |
| N | -0.209831000 | -0.330855000 | 0.000069000  |
| B | 0.984463000  | 2.131649000  | 0.000052000  |
| H | 1.631726000  | 2.450362000  | -0.991660000 |
| H | -0.078876000 | 2.704496000  | 0.001195000  |
| N | 1.954841000  | -0.270209000 | 0.000016000  |
| C | 3.331777000  | 0.213519000  | -0.000052000 |
| H | 3.516839000  | 0.819049000  | -0.889515000 |
| H | 3.517296000  | 0.818078000  | 0.889981000  |
| H | 3.996417000  | -0.650268000 | -0.000695000 |
| C | -1.666984000 | 0.052644000  | -0.000003000 |
| C | -1.969296000 | 0.849946000  | 1.276440000  |
| H | -1.395977000 | 1.775733000  | 1.321309000  |
| H | -3.034344000 | 1.100499000  | 1.298485000  |
| H | -1.738501000 | 0.247137000  | 2.160925000  |
| C | -1.968975000 | 0.850700000  | -1.276046000 |
| H | -3.034019000 | 1.101254000  | -1.298184000 |
| H | -1.395661000 | 1.776523000  | -1.320249000 |
| H | -1.737975000 | 0.248418000  | -2.160835000 |
| C | -2.529799000 | -1.215454000 | -0.000507000 |
| H | -2.361644000 | -1.826030000 | -0.892603000 |
| H | -2.362084000 | -1.826481000 | 0.891365000  |
| H | -3.577498000 | -0.904286000 | -0.000674000 |
| H | 1.633746000  | 2.450142000  | 0.990499000  |

END-----

Structure-----

**13**

|   |              |              |              |
|---|--------------|--------------|--------------|
| C | 0.002823000  | 0.706094000  | -0.076241000 |
| C | -0.698259000 | -1.430488000 | 0.116096000  |
| C | 0.659845000  | -1.446261000 | 0.107611000  |
| H | -1.413119000 | -2.233521000 | 0.191437000  |
| H | 1.356667000  | -2.265820000 | 0.175466000  |
| N | -1.086198000 | -0.102215000 | 0.001928000  |
| B | 0.078194000  | 2.308605000  | -0.202844000 |
| H | 0.715835000  | 2.747793000  | 0.746117000  |
| H | 0.669516000  | 2.599369000  | -1.235487000 |
| H | -1.033656000 | 2.799820000  | -0.212292000 |
| N | 1.072853000  | -0.128819000 | -0.013388000 |
| C | 2.487005000  | 0.300394000  | -0.046668000 |
| H | 2.451876000  | 1.376879000  | -0.211640000 |
| C | -2.501476000 | 0.328296000  | -0.030886000 |
| H | -2.465477000 | 1.411046000  | -0.139060000 |
| C | -3.188012000 | -0.021952000 | 1.289114000  |
| H | -4.210126000 | 0.369040000  | 1.282540000  |
| H | -3.239986000 | -1.105866000 | 1.436920000  |
| H | -2.653033000 | 0.421137000  | 2.134980000  |
| C | -3.207627000 | -0.274420000 | -1.245332000 |
| H | -3.269332000 | -1.365290000 | -1.171059000 |
| H | -4.226799000 | 0.119545000  | -1.305383000 |
| H | -2.681122000 | -0.015720000 | -2.169383000 |
| C | 3.151069000  | 0.019822000  | 1.301314000  |
| H | 3.190834000  | -1.055578000 | 1.505538000  |
| H | 4.176004000  | 0.403286000  | 1.291461000  |
| H | 2.604918000  | 0.510398000  | 2.112974000  |
| C | 3.214072000  | -0.360986000 | -1.216955000 |
| H | 2.699369000  | -0.156044000 | -2.160866000 |
| H | 4.231434000  | 0.036389000  | -1.283366000 |
| H | 3.282005000  | -1.445643000 | -1.082777000 |

END-----

Structure-----

**14**

|   |              |              |              |
|---|--------------|--------------|--------------|
| C | -0.735410000 | 0.605915000  | -0.008703000 |
| C | 0.121123000  | -1.482219000 | 0.003017000  |
| C | -1.233632000 | -1.596036000 | 0.007499000  |
| H | 0.893302000  | -2.233961000 | 0.006234000  |
| H | -1.876062000 | -2.462475000 | 0.014661000  |

|   |              |              |              |
|---|--------------|--------------|--------------|
| N | 0.409195000  | -0.124096000 | -0.006915000 |
| B | -0.957982000 | 2.194334000  | -0.015060000 |
| H | -1.550867000 | 2.506611000  | 1.011514000  |
| H | 0.096744000  | 2.794239000  | -0.086294000 |
| N | -1.740675000 | -0.307715000 | 0.000527000  |
| C | -3.161121000 | 0.027276000  | 0.002770000  |
| H | -3.400191000 | 0.635211000  | 0.877778000  |
| H | -3.416706000 | 0.582999000  | -0.901946000 |
| H | -3.732611000 | -0.899945000 | 0.035596000  |
| C | 1.785515000  | 0.418359000  | -0.004893000 |
| C | 2.506480000  | 0.014649000  | 1.281079000  |
| H | 3.492446000  | 0.488659000  | 1.309371000  |
| H | 1.941652000  | 0.336826000  | 2.161503000  |
| H | 2.649142000  | -1.069909000 | 1.333816000  |
| C | 2.527249000  | -0.024296000 | -1.265809000 |
| H | 2.672887000  | -1.109593000 | -1.282736000 |
| H | 1.976251000  | 0.269303000  | -2.164811000 |
| H | 3.512791000  | 0.450612000  | -1.292908000 |
| H | -1.671289000 | 2.480294000  | -0.969025000 |
| H | 1.661568000  | 1.500238000  | -0.022498000 |

END-----

Structure-----

**15**

|    |              |              |              |
|----|--------------|--------------|--------------|
| C  | -0.301229000 | 0.591293000  | -0.000011000 |
| C  | -1.109809000 | -1.524613000 | -0.000001000 |
| C  | 0.243899000  | -1.635627000 | -0.000001000 |
| H  | -1.876197000 | -2.283766000 | -0.000001000 |
| H  | 0.903626000  | -2.487900000 | -0.000015000 |
| N  | -1.418516000 | -0.171308000 | 0.000005000  |
| B  | -0.153069000 | 2.182636000  | 0.000020000  |
| H  | 0.479176000  | 2.509921000  | 0.994234000  |
| H  | 0.479516000  | 2.509947000  | -0.993964000 |
| H  | -1.252786000 | 2.696341000  | -0.000159000 |
| N  | 0.706510000  | -0.325589000 | -0.000030000 |
| C  | -2.787512000 | 0.350448000  | 0.000019000  |
| H  | -2.955965000 | 0.954776000  | 0.892105000  |
| H  | -2.955998000 | 0.954735000  | -0.892089000 |
| H  | -3.467945000 | -0.500716000 | 0.000051000  |
| Cl | 2.360227000  | 0.089574000  | -0.000007000 |

END-----

Structure-----

**16**

|   |              |              |              |
|---|--------------|--------------|--------------|
| C | -0.807218000 | 0.562700000  | -0.000078000 |
| C | -1.598150000 | -1.557422000 | -0.000088000 |
| C | -0.250397000 | -1.661285000 | -0.000102000 |
| H | -2.362019000 | -2.318633000 | -0.000109000 |
| H | 0.400787000  | -2.518764000 | -0.000128000 |
| N | -1.913156000 | -0.202661000 | -0.000102000 |
| B | -0.720383000 | 2.163660000  | -0.000072000 |
| H | -0.108699000 | 2.521881000  | 0.992403000  |
| H | -0.110444000 | 2.521994000  | -0.993582000 |
| H | -1.843452000 | 2.620120000  | 0.000935000  |
| N | 0.227689000  | -0.345606000 | -0.000099000 |
| C | 1.613461000  | 0.003849000  | 0.000110000  |
| C | -3.289913000 | 0.301516000  | -0.000182000 |
| H | -3.464905000 | 0.903301000  | 0.891895000  |
| H | -3.464797000 | 0.903317000  | -0.892269000 |
| H | -3.958255000 | -0.558760000 | -0.000231000 |
| F | 2.360854000  | -1.111805000 | -0.000634000 |
| F | 1.947680000  | 0.724570000  | 1.085840000  |
| F | 1.947606000  | 0.726010000  | -1.084663000 |

END-----

Structure-----

**17**

|   |              |              |              |
|---|--------------|--------------|--------------|
| C | -0.055902000 | -0.261887000 | 0.012670000  |
| C | 1.011064000  | 1.730146000  | -0.019560000 |
| C | 1.962617000  | 0.759476000  | -0.023814000 |
| H | 1.090829000  | 2.805463000  | -0.030625000 |
| H | 3.039449000  | 0.816689000  | -0.039913000 |
| N | -0.218134000 | 1.087140000  | 0.002553000  |
| B | -1.118538000 | -1.481212000 | 0.049345000  |
| H | -0.784702000 | -2.230668000 | -0.871738000 |
| N | 1.291164000  | -0.450751000 | -0.003601000 |
| C | 1.946577000  | -1.754615000 | 0.004196000  |
| H | 1.639131000  | -2.321701000 | 0.885066000  |
| H | 1.678911000  | -2.315055000 | -0.893961000 |
| H | 3.024559000  | -1.595952000 | 0.029532000  |
| C | -1.490130000 | 1.811173000  | 0.032420000  |
| H | -2.099489000 | 1.543124000  | -0.830112000 |
| H | -2.032673000 | 1.584736000  | 0.950665000  |
| H | -1.269201000 | 2.878003000  | -0.000874000 |
| H | -0.873959000 | -2.095620000 | 1.092796000  |
| C | -2.704132000 | -1.114100000 | -0.053766000 |
| H | -3.078904000 | -0.498782000 | 0.775611000  |
| H | -2.980522000 | -0.596730000 | -0.983496000 |

H -3.292523000 -2.043330000 -0.035220000  
END-----

Structure-----

**18**

|   |              |              |              |
|---|--------------|--------------|--------------|
| C | 1.323462000  | 0.033593000  | 0.509140000  |
| C | 3.172493000  | -0.101229000 | -0.774940000 |
| C | 2.695218000  | 1.169659000  | -0.876138000 |
| H | 4.031919000  | -0.577282000 | -1.219700000 |
| H | 3.053209000  | 2.023852000  | -1.428907000 |
| N | 2.315992000  | -0.782117000 | 0.075807000  |
| B | 0.073136000  | -0.318707000 | 1.459374000  |
| H | 0.039809000  | 0.505622000  | 2.365140000  |
| H | 0.255917000  | -1.426580000 | 1.941021000  |
| N | 1.564216000  | 1.231704000  | -0.080284000 |
| C | 0.708987000  | 2.407572000  | 0.051617000  |
| H | -0.163759000 | 2.313842000  | -0.599167000 |
| H | 0.378839000  | 2.502071000  | 1.086137000  |
| H | 1.285413000  | 3.288394000  | -0.231847000 |
| C | 2.480535000  | -2.187323000 | 0.446805000  |
| H | 2.700095000  | -2.274404000 | 1.512377000  |
| H | 1.571755000  | -2.743872000 | 0.215473000  |
| H | 3.311631000  | -2.592557000 | -0.130110000 |
| C | -1.310529000 | -0.275803000 | 0.610539000  |
| C | -2.479270000 | 0.323992000  | 1.118468000  |
| C | -1.411710000 | -0.853304000 | -0.672555000 |
| C | -3.681452000 | 0.342008000  | 0.400182000  |
| H | -2.447874000 | 0.793705000  | 2.099822000  |
| C | -2.603439000 | -0.840480000 | -1.404897000 |
| H | -0.534108000 | -1.323545000 | -1.113608000 |
| C | -3.749430000 | -0.241379000 | -0.869058000 |
| H | -4.561853000 | 0.815804000  | 0.828113000  |
| H | -2.639327000 | -1.295721000 | -2.391885000 |
| H | -4.677976000 | -0.226756000 | -1.433363000 |

END-----

Structure-----

**19**

|   |             |              |              |
|---|-------------|--------------|--------------|
| C | 0.115483000 | -0.152303000 | 0.314914000  |
| C | 2.188390000 | 0.299228000  | -0.428433000 |
| C | 1.518249000 | 1.481227000  | -0.335402000 |
| H | 3.197576000 | 0.074685000  | -0.735115000 |
| H | 1.823613000 | 2.493330000  | -0.548602000 |
| N | 1.308355000 | -0.691944000 | -0.027704000 |

|   |              |              |              |
|---|--------------|--------------|--------------|
| B | -1.189736000 | -0.916552000 | 0.857254000  |
| H | -1.527236000 | -0.431177000 | 1.920243000  |
| H | -0.962668000 | -2.096432000 | 0.987735000  |
| N | 0.249206000  | 1.181827000  | 0.126562000  |
| C | -0.812904000 | 2.164293000  | 0.333267000  |
| H | -1.489499000 | 2.173386000  | -0.524602000 |
| H | -1.370700000 | 1.909528000  | 1.234781000  |
| H | -0.355855000 | 3.146704000  | 0.450697000  |
| C | 1.642398000  | -2.116453000 | 0.023177000  |
| H | 1.612691000  | -2.472742000 | 1.054067000  |
| H | 0.936917000  | -2.686168000 | -0.582542000 |
| H | 2.648603000  | -2.240723000 | -0.376118000 |
| C | -2.394022000 | -0.740645000 | -0.162676000 |
| N | -3.287607000 | -0.618414000 | -0.903985000 |

END-----

Structure-----

**20**

|   |              |              |              |
|---|--------------|--------------|--------------|
| C | 0.047470000  | -0.283945000 | 0.001325000  |
| C | -0.709790000 | 1.834885000  | -0.001386000 |
| C | -1.794152000 | 1.013264000  | -0.001773000 |
| H | -0.629638000 | 2.910249000  | -0.002225000 |
| H | -2.851636000 | 1.224962000  | -0.003057000 |
| N | 0.412737000  | 1.019531000  | 0.000586000  |
| B | 0.939343000  | -1.634176000 | 0.004863000  |
| H | 0.654669000  | -2.273755000 | 1.012017000  |
| N | -1.307044000 | -0.282843000 | -0.000108000 |
| C | -2.132930000 | -1.487634000 | -0.000108000 |
| H | -1.924459000 | -2.081676000 | -0.892512000 |
| H | -1.920611000 | -2.084152000 | 0.889711000  |
| H | -3.179886000 | -1.186125000 | 0.002634000  |
| C | 1.783808000  | 1.535819000  | 0.002392000  |
| H | 2.312471000  | 1.196837000  | 0.893468000  |
| H | 2.314209000  | 1.198924000  | -0.888427000 |
| H | 1.727947000  | 2.624048000  | 0.003629000  |
| H | 0.642236000  | -2.287174000 | -0.989868000 |
| F | 2.361299000  | -1.322489000 | -0.006193000 |

END-----

Structure-----

**21**

|   |              |              |              |
|---|--------------|--------------|--------------|
| C | -0.682003000 | -0.021202000 | 0.445249000  |
| C | -2.682078000 | -0.560607000 | -0.435411000 |
| C | -2.595819000 | 0.798022000  | -0.411827000 |



|   |              |              |              |
|---|--------------|--------------|--------------|
| H | -3.467749000 | -1.218783000 | -0.770906000 |
| H | -3.289095000 | 1.561828000  | -0.726517000 |
| N | -1.498462000 | -1.044175000 | 0.091640000  |
| B | 0.777805000  | -0.144212000 | 1.101431000  |
| H | 0.970294000  | 0.766449000  | 1.878476000  |
| N | -1.363146000 | 1.108880000  | 0.133485000  |
| C | -0.869871000 | 2.476644000  | 0.285002000  |
| H | -0.115555000 | 2.500258000  | 1.069222000  |
| H | -0.432938000 | 2.823130000  | -0.654422000 |
| H | -1.707099000 | 3.119950000  | 0.558746000  |
| C | -1.194146000 | -2.466331000 | 0.255935000  |
| H | -0.256850000 | -2.707694000 | -0.245654000 |
| H | -1.117046000 | -2.713471000 | 1.316205000  |
| H | -2.005293000 | -3.037964000 | -0.194118000 |
| H | 0.895793000  | -1.217292000 | 1.649003000  |
| C | 1.928134000  | -0.054429000 | -0.033226000 |
| F | 1.947467000  | 1.125295000  | -0.759349000 |
| F | 1.872068000  | -1.038992000 | -1.006338000 |
| F | 3.207406000  | -0.157511000 | 0.477088000  |

END-----

Structure-----

**22**

|   |              |              |              |
|---|--------------|--------------|--------------|
| C | 1.460256000  | 0.295131000  | -0.279239000 |
| C | -0.275944000 | 1.741879000  | -0.001658000 |
| C | -0.801270000 | 0.482556000  | 0.029235000  |
| N | 1.094375000  | 1.588612000  | -0.192715000 |
| B | 2.962893000  | -0.254021000 | -0.514079000 |
| H | 2.902572000  | -1.393397000 | -0.932875000 |
| H | 3.434660000  | 0.463118000  | -1.387997000 |
| N | 0.293170000  | -0.406796000 | -0.119920000 |
| C | 0.271955000  | -1.845689000 | -0.077482000 |
| C | 2.018763000  | 2.722504000  | -0.273470000 |
| H | 2.116159000  | 3.183621000  | 0.711292000  |
| H | 2.983897000  | 2.354986000  | -0.609656000 |
| H | 1.631116000  | 3.449717000  | -0.987665000 |
| C | -2.241645000 | 0.091862000  | 0.085211000  |
| F | -2.575940000 | -0.787416000 | -0.895349000 |
| F | -2.610702000 | -0.476922000 | 1.263426000  |
| F | -3.037810000 | 1.170921000  | -0.080801000 |
| C | 3.831855000  | -0.146265000 | 0.871119000  |
| H | 3.887604000  | 0.877819000  | 1.266667000  |
| H | 3.425303000  | -0.776114000 | 1.674803000  |
| H | 4.866024000  | -0.476622000 | 0.700322000  |

|   |              |              |              |
|---|--------------|--------------|--------------|
| F | 0.445146000  | -2.377436000 | -1.301406000 |
| F | 1.233673000  | -2.319625000 | 0.725706000  |
| F | -0.900308000 | -2.283584000 | 0.398887000  |
| C | -0.879269000 | 3.096433000  | 0.123721000  |
| H | -1.899630000 | 3.044644000  | 0.494380000  |
| H | -0.288540000 | 3.701001000  | 0.817666000  |
| H | -0.881182000 | 3.604708000  | -0.846909000 |

END-----

Structure-----

**23**

|    |              |              |              |
|----|--------------|--------------|--------------|
| C  | 1.139942000  | -0.052183000 | -0.000086000 |
| C  | 0.212504000  | 2.025748000  | 0.000112000  |
| C  | -0.814358000 | 1.153731000  | 0.000179000  |
| N  | 1.379633000  | 1.273321000  | -0.000068000 |
| B  | 2.165576000  | -1.320811000 | -0.000272000 |
| H  | 1.854780000  | -1.975028000 | 0.988267000  |
| H  | 1.854505000  | -1.974952000 | -0.988777000 |
| N  | -0.251013000 | -0.135648000 | 0.000024000  |
| C  | -1.075073000 | -1.311748000 | 0.000025000  |
| C  | 2.676275000  | 1.961129000  | -0.000218000 |
| H  | 3.479626000  | 1.238289000  | -0.000241000 |
| H  | 2.736646000  | 2.586567000  | -0.892996000 |
| H  | 2.736787000  | 2.586661000  | 0.892484000  |
| Cl | -2.494989000 | 1.487834000  | 0.000375000  |
| H  | 0.219097000  | 3.104100000  | 0.000164000  |
| C  | 3.770149000  | -1.037753000 | -0.000479000 |
| H  | 4.144053000  | -0.505970000 | -0.886818000 |
| H  | 4.144304000  | -0.506117000 | 0.885843000  |
| H  | 4.276180000  | -2.014181000 | -0.000630000 |
| F  | -0.379626000 | -2.438668000 | -0.000197000 |
| F  | -1.877904000 | -1.315319000 | -1.087603000 |
| F  | -1.877583000 | -1.315540000 | 1.087888000  |

END-----

Structure-----

**24**

|   |              |              |              |
|---|--------------|--------------|--------------|
| C | 0.990309000  | -0.518892000 | -0.017247000 |
| C | 1.421186000  | 0.811125000  | 0.070884000  |
| C | 2.766770000  | 1.164427000  | -0.013131000 |
| C | 3.681120000  | 0.125356000  | -0.180686000 |
| C | 3.253577000  | -1.211689000 | -0.259298000 |
| C | 1.903974000  | -1.561884000 | -0.180382000 |
| C | -0.833531000 | 0.861143000  | 0.277592000  |

|   |              |              |              |
|---|--------------|--------------|--------------|
| H | 3.082967000  | 2.199144000  | 0.050085000  |
| H | 4.739787000  | 0.353073000  | -0.249874000 |
| H | 3.989104000  | -1.999517000 | -0.385657000 |
| H | 1.600113000  | -2.596923000 | -0.242412000 |
| C | 0.346454000  | 3.059206000  | 0.364567000  |
| H | 1.074955000  | 3.322095000  | 1.134051000  |
| H | 0.653463000  | 3.484960000  | -0.593502000 |
| H | -0.634889000 | 3.433181000  | 0.642384000  |
| C | -1.322738000 | -1.552398000 | 0.085834000  |
| N | 0.284402000  | 1.603516000  | 0.250040000  |
| N | -0.419052000 | -0.447312000 | 0.101266000  |
| B | -2.338143000 | 1.424618000  | 0.429601000  |
| H | -3.064150000 | 0.522736000  | 0.798981000  |
| H | -2.291521000 | 2.283763000  | 1.300473000  |
| F | -2.325902000 | -1.365222000 | -0.789317000 |
| F | -1.871952000 | -1.774350000 | 1.298317000  |
| F | -0.677916000 | -2.673906000 | -0.273778000 |
| C | -2.830419000 | 2.062144000  | -1.000699000 |
| H | -2.181869000 | 2.875993000  | -1.354489000 |
| H | -2.871011000 | 1.314409000  | -1.805239000 |
| H | -3.841971000 | 2.480642000  | -0.903552000 |

END-----

Structure-----

**25**

|   |              |              |              |
|---|--------------|--------------|--------------|
| C | 0.984979000  | -0.520956000 | -0.016362000 |
| C | 1.427423000  | 0.802729000  | 0.074929000  |
| C | 2.780468000  | 1.110619000  | -0.015694000 |
| C | 3.631125000  | 0.021156000  | -0.191133000 |
| C | 1.914431000  | -1.548028000 | -0.188324000 |
| C | -0.821620000 | 0.866688000  | 0.283208000  |
| H | 3.154482000  | 2.125293000  | 0.045594000  |
| H | 4.702076000  | 0.182543000  | -0.270043000 |
| H | 1.630192000  | -2.589939000 | -0.257278000 |
| C | 0.379967000  | 3.060621000  | 0.372380000  |
| H | 1.131952000  | 3.315312000  | 1.121259000  |
| H | 0.660737000  | 3.485417000  | -0.593849000 |
| H | -0.591192000 | 3.437999000  | 0.680006000  |
| C | -1.327335000 | -1.548560000 | 0.086348000  |
| N | 0.305741000  | 1.604167000  | 0.257106000  |
| N | -0.419766000 | -0.442439000 | 0.106794000  |
| B | -2.319045000 | 1.441303000  | 0.427965000  |
| H | -3.055785000 | 0.541727000  | 0.777916000  |
| H | -2.269914000 | 2.292047000  | 1.305670000  |

|   |              |              |              |
|---|--------------|--------------|--------------|
| N | 3.219526000  | -1.260908000 | -0.272416000 |
| C | -2.784928000 | 2.096124000  | -1.003997000 |
| H | -2.124621000 | 2.906160000  | -1.343436000 |
| H | -2.824720000 | 1.354737000  | -1.814104000 |
| H | -3.793003000 | 2.523383000  | -0.912053000 |
| F | -1.893533000 | -1.756919000 | 1.290175000  |
| F | -2.312038000 | -1.366761000 | -0.807875000 |
| F | -0.668932000 | -2.668463000 | -0.252080000 |

END-----

Structure-----

**26**

|   |              |              |              |
|---|--------------|--------------|--------------|
| C | -0.751939000 | 0.963259000  | 0.293313000  |
| C | 1.202792000  | -0.130197000 | 0.028289000  |
| C | 0.242743000  | -1.095209000 | -0.055432000 |
| N | 0.579123000  | 1.103543000  | 0.247288000  |
| B | -1.828639000 | 2.154292000  | 0.496807000  |
| H | -2.884267000 | 1.673484000  | 0.856880000  |
| H | -1.386391000 | 2.854472000  | 1.399157000  |
| N | -0.967065000 | -0.386409000 | 0.091990000  |
| C | 1.274081000  | 2.389558000  | 0.384255000  |
| H | 0.571581000  | 3.104800000  | 0.802655000  |
| H | 2.120500000  | 2.274631000  | 1.060675000  |
| H | 1.615312000  | 2.729744000  | -0.594060000 |
| C | -1.982117000 | 3.009498000  | -0.893554000 |
| H | -1.034683000 | 3.447434000  | -1.238015000 |
| H | -2.371657000 | 2.402146000  | -1.722834000 |
| H | -2.684051000 | 3.843600000  | -0.753749000 |
| C | 2.687975000  | -0.241541000 | -0.059967000 |
| C | -2.296809000 | -0.937796000 | 0.060297000  |
| C | 0.359625000  | -2.572336000 | -0.222095000 |
| H | -0.189894000 | -3.093578000 | 0.565193000  |
| H | -0.035002000 | -2.893861000 | -1.189786000 |
| H | 1.404343000  | -2.865149000 | -0.158636000 |
| F | -3.077409000 | -0.259375000 | -0.794979000 |
| F | -2.281945000 | -2.215306000 | -0.337879000 |
| F | -2.871837000 | -0.898294000 | 1.276819000  |
| F | 3.209882000  | 0.660280000  | -0.933521000 |
| F | 3.094294000  | -1.459640000 | -0.468527000 |
| F | 3.295337000  | -0.003279000 | 1.136190000  |

END-----

Structure-----

**27**

|    |              |              |              |
|----|--------------|--------------|--------------|
| C  | 0.142564000  | 0.081396000  | -0.000277000 |
| C  | 1.237844000  | 2.073097000  | -0.000121000 |
| C  | 2.188804000  | 1.118902000  | -0.000038000 |
| N  | 0.011577000  | 1.422027000  | -0.000269000 |
| B  | -0.978606000 | -1.102637000 | -0.000299000 |
| H  | -0.737739000 | -1.771585000 | -0.992511000 |
| H  | -0.737462000 | -1.771817000 | 0.991687000  |
| N  | 1.519942000  | -0.118774000 | -0.000129000 |
| C  | 2.242939000  | -1.360769000 | -0.000104000 |
| C  | -1.219975000 | 2.222421000  | -0.000379000 |
| H  | -2.084024000 | 1.572034000  | -0.000762000 |
| H  | -1.224042000 | 2.849352000  | 0.893183000  |
| H  | -1.223579000 | 2.849769000  | -0.893649000 |
| Cl | 3.890965000  | 1.312155000  | 0.000188000  |
| H  | 1.321308000  | 3.148082000  | -0.000082000 |
| F  | 1.453346000  | -2.424373000 | -0.000399000 |
| F  | 3.041180000  | -1.431762000 | 1.087674000  |
| F  | 3.041636000  | -1.431522000 | -1.087563000 |
| C  | -2.525168000 | -0.647054000 | -0.000000000 |
| C  | -3.242596000 | -0.456862000 | -1.198077000 |
| C  | -3.242009000 | -0.456428000 | 1.198350000  |
| C  | -4.586717000 | -0.068834000 | -1.206656000 |
| H  | -2.732786000 | -0.606299000 | -2.147992000 |
| C  | -4.586129000 | -0.068387000 | 1.207445000  |
| H  | -2.731747000 | -0.605523000 | 2.148077000  |
| C  | -5.264625000 | 0.133554000  | 0.000526000  |
| H  | -5.105608000 | 0.073731000  | -2.151487000 |
| H  | -5.104549000 | 0.074521000  | 2.152482000  |
| H  | -6.308822000 | 0.434205000  | 0.000720000  |

END-----

Structure-----

**28**

|   |              |              |              |
|---|--------------|--------------|--------------|
| C | 0.108664000  | 0.782659000  | 0.298594000  |
| C | -1.609038000 | -0.637077000 | -0.040699000 |
| C | -0.489315000 | -1.386004000 | -0.157800000 |
| N | -1.234601000 | 0.675751000  | 0.236385000  |
| B | 0.960064000  | 2.133743000  | 0.537144000  |
| H | 0.417926000  | 2.725980000  | 1.462144000  |
| H | 2.086959000  | 1.818930000  | 0.871412000  |
| N | 0.562964000  | -0.490034000 | 0.051550000  |
| C | 1.944519000  | -0.872738000 | 0.027236000  |
| C | -2.179129000 | 1.779932000  | 0.414095000  |
| H | -1.621102000 | 2.653323000  | 0.739710000  |

|    |              |              |              |
|----|--------------|--------------|--------------|
| H  | -2.681031000 | 1.987029000  | -0.532991000 |
| H  | -2.912595000 | 1.506793000  | 1.174061000  |
| C  | 0.958640000  | 3.037046000  | -0.831337000 |
| H  | 1.437852000  | 2.522800000  | -1.676643000 |
| H  | -0.051363000 | 3.318708000  | -1.161419000 |
| H  | 1.513154000  | 3.972755000  | -0.673115000 |
| F  | 2.519287000  | -0.746005000 | 1.235910000  |
| F  | 2.646212000  | -0.134388000 | -0.846580000 |
| F  | 2.043508000  | -2.160340000 | -0.341149000 |
| H  | -0.351459000 | -2.433291000 | -0.365184000 |
| Cl | -3.248489000 | -1.111651000 | -0.190201000 |

END-----

Structure-----

**29**

|    |              |              |              |
|----|--------------|--------------|--------------|
| C  | 1.139308000  | -0.107819000 | -0.000703000 |
| C  | 0.327315000  | 2.006511000  | -0.000236000 |
| C  | -0.743654000 | 1.186129000  | -0.000221000 |
| N  | 1.455432000  | 1.196931000  | -0.000167000 |
| B  | 2.123068000  | -1.421825000 | -0.000387000 |
| H  | 1.880025000  | -2.063897000 | 1.005677000  |
| H  | 1.881308000  | -2.063193000 | -1.007287000 |
| N  | -0.244180000 | -0.128420000 | 0.000037000  |
| C  | -1.099950000 | -1.281609000 | 0.000019000  |
| C  | 2.797175000  | 1.799444000  | 0.000006000  |
| H  | 3.542980000  | 1.013510000  | -0.000124000 |
| H  | 2.895827000  | 2.419583000  | -0.892865000 |
| H  | 2.895900000  | 2.419340000  | 0.893039000  |
| Cl | -2.407075000 | 1.588134000  | 0.000272000  |
| H  | 0.389626000  | 3.083025000  | -0.000033000 |
| F  | -0.407791000 | -2.414315000 | -0.001506000 |
| F  | -1.899251000 | -1.270965000 | -1.085966000 |
| F  | -1.897368000 | -1.272618000 | 1.087390000  |
| F  | 3.517670000  | -1.019108000 | 0.000818000  |

END-----

Structure-----

**30**

|   |              |              |              |
|---|--------------|--------------|--------------|
| C | -2.126152000 | 0.133088000  | -0.177529000 |
| C | -2.011714000 | -1.201396000 | 0.223786000  |
| C | -3.033861000 | -2.111916000 | -0.020444000 |
| C | -4.150402000 | -1.593393000 | -0.672815000 |
| C | -3.287420000 | 0.561849000  | -0.823270000 |
| C | -0.108668000 | -0.174852000 | 0.871237000  |

|   |              |              |              |
|---|--------------|--------------|--------------|
| H | -2.974876000 | -3.152150000 | 0.275509000  |
| H | -4.991462000 | -2.242236000 | -0.897889000 |
| H | -3.434080000 | 1.583824000  | -1.148117000 |
| C | -0.306221000 | -2.620361000 | 1.385162000  |
| H | -0.977888000 | -2.939792000 | 2.184842000  |
| H | -0.306801000 | -3.360032000 | 0.582370000  |
| H | 0.700471000  | -2.491556000 | 1.771393000  |
| C | -0.573840000 | 2.118394000  | 0.057469000  |
| N | -0.776278000 | -1.342600000 | 0.847829000  |
| N | -0.917426000 | 0.738657000  | 0.227208000  |
| B | 1.348060000  | 0.085355000  | 1.507201000  |
| H | 1.404805000  | 1.241738000  | 1.867735000  |
| H | 1.430315000  | -0.637049000 | 2.487035000  |
| N | -4.277917000 | -0.306704000 | -1.058931000 |
| F | -0.639887000 | 2.798649000  | 1.218508000  |
| F | 0.663564000  | 2.262158000  | -0.436581000 |
| F | -1.430744000 | 2.694533000  | -0.799978000 |
| C | 2.530031000  | -0.249884000 | 0.446407000  |
| C | 2.394158000  | -1.146733000 | -0.631213000 |
| C | 3.794167000  | 0.354988000  | 0.603390000  |
| C | 3.455286000  | -1.432709000 | -1.499212000 |
| H | 1.440976000  | -1.639673000 | -0.808858000 |
| C | 4.864069000  | 0.074989000  | -0.252442000 |
| H | 3.943273000  | 1.063937000  | 1.415381000  |
| C | 4.699287000  | -0.823428000 | -1.312968000 |
| H | 3.308126000  | -2.129761000 | -2.320628000 |
| H | 5.823764000  | 0.561846000  | -0.096454000 |
| H | 5.525687000  | -1.041221000 | -1.983957000 |

END-----

Structure-----

**31**

|   |              |              |              |
|---|--------------|--------------|--------------|
| C | 0.942562000  | 0.040716000  | -0.000098000 |
| C | -0.090378000 | 2.056401000  | 0.000121000  |
| C | -1.067626000 | 1.127516000  | 0.000212000  |
| N | 1.117385000  | 1.372983000  | -0.000092000 |
| B | 2.007978000  | -1.176904000 | -0.000255000 |
| H | 1.813007000  | -1.847569000 | 0.988540000  |
| H | 1.812878000  | -1.847446000 | -0.989116000 |
| N | -0.433273000 | -0.127141000 | 0.000017000  |
| C | -1.184352000 | -1.356202000 | -0.000011000 |
| C | 2.376361000  | 2.129942000  | -0.000303000 |
| H | 3.220533000  | 1.451857000  | -0.000339000 |
| H | 2.402014000  | 2.755368000  | -0.894176000 |

|    |              |              |              |
|----|--------------|--------------|--------------|
| H  | 2.402213000  | 2.755520000  | 0.893457000  |
| Cl | -2.762721000 | 1.360614000  | 0.000494000  |
| H  | -0.144518000 | 3.133306000  | 0.000183000  |
| F  | -0.408111000 | -2.430674000 | -0.000496000 |
| F  | -1.980313000 | -1.409828000 | -1.086966000 |
| F  | -1.979647000 | -1.410295000 | 1.087410000  |
| C  | 3.538387000  | -0.788763000 | -0.000296000 |
| N  | 4.693481000  | -0.624050000 | -0.000346000 |

END-----

Structure-----

**32**

|    |              |              |              |
|----|--------------|--------------|--------------|
| C  | 0.217359000  | 0.961354000  | 0.282582000  |
| C  | -1.620832000 | -0.302786000 | 0.010889000  |
| C  | -0.587437000 | -1.177816000 | -0.086478000 |
| N  | -1.125618000 | 0.978948000  | 0.233193000  |
| B  | 1.176553000  | 2.249473000  | 0.482726000  |
| H  | 2.269399000  | 1.869990000  | 0.857088000  |
| N  | 0.555228000  | -0.359686000 | 0.076843000  |
| C  | -1.966260000 | 2.168556000  | 0.374339000  |
| H  | -1.327602000 | 3.006986000  | 0.636037000  |
| H  | -2.477470000 | 2.367895000  | -0.569402000 |
| H  | -2.697492000 | 2.001475000  | 1.166753000  |
| C  | 1.267846000  | 3.097289000  | -0.918170000 |
| H  | 1.718920000  | 2.516538000  | -1.735400000 |
| H  | 0.287468000  | 3.441934000  | -1.277174000 |
| H  | 1.889485000  | 3.994052000  | -0.785214000 |
| C  | 1.919834000  | -0.804690000 | 0.078149000  |
| C  | -0.627210000 | -2.649428000 | -0.302582000 |
| H  | -0.152081000 | -2.933835000 | -1.245272000 |
| H  | -0.135317000 | -3.189229000 | 0.511018000  |
| H  | -1.672329000 | -2.962371000 | -0.337736000 |
| F  | 2.474983000  | -0.694236000 | 1.300866000  |
| F  | 2.001798000  | -2.091612000 | -0.285666000 |
| F  | 2.666227000  | -0.092055000 | -0.782059000 |
| Cl | -3.303816000 | -0.615770000 | -0.112206000 |
| H  | 0.664990000  | 2.918714000  | 1.372281000  |

END-----

Structure-----

**33**

|   |              |              |              |
|---|--------------|--------------|--------------|
| C | 0.407548000  | 0.604674000  | 0.223227000  |
| C | -0.796939000 | -1.318483000 | -0.109131000 |
| C | 0.502889000  | -1.665025000 | -0.143912000 |



|    |              |              |              |
|----|--------------|--------------|--------------|
| N  | -0.851531000 | 0.074122000  | 0.115740000  |
| B  | 0.884967000  | 2.138949000  | 0.420357000  |
| H  | 2.048389000  | 2.092578000  | 0.758525000  |
| N  | 1.216979000  | -0.480296000 | 0.056688000  |
| C  | -2.109374000 | 0.786395000  | 0.195600000  |
| C  | 0.710179000  | 2.957207000  | -0.990981000 |
| H  | 1.325584000  | 2.535438000  | -1.797671000 |
| H  | -0.323728000 | 2.989610000  | -1.357837000 |
| H  | 1.034569000  | 3.998055000  | -0.854874000 |
| C  | 2.663605000  | -0.446406000 | 0.085591000  |
| F  | 3.123406000  | -0.117702000 | 1.299388000  |
| F  | 3.127346000  | -1.667766000 | -0.216349000 |
| F  | 3.150574000  | 0.417711000  | -0.810926000 |
| Cl | -2.166137000 | -2.323983000 | -0.291702000 |
| H  | 0.224412000  | 2.616871000  | 1.323212000  |
| H  | 0.967940000  | -2.625338000 | -0.287828000 |
| F  | -2.796290000 | 0.617103000  | -0.949323000 |
| F  | -2.850468000 | 0.283854000  | 1.199452000  |
| F  | -1.943818000 | 2.082223000  | 0.400456000  |

END-----

Structure-----

**34**

|    |              |              |              |
|----|--------------|--------------|--------------|
| C  | -0.409243000 | 0.382107000  | -0.577661000 |
| C  | -2.142455000 | -0.721221000 | 0.433416000  |
| C  | -2.394542000 | 0.595683000  | 0.558907000  |
| N  | -0.923403000 | -0.846918000 | -0.264222000 |
| B  | 0.976728000  | 0.768114000  | -1.319531000 |
| H  | 0.930939000  | 1.957455000  | -1.540577000 |
| N  | -1.325173000 | 1.246923000  | -0.060852000 |
| C  | -0.341977000 | -2.137771000 | -0.571558000 |
| C  | -1.236213000 | 2.691829000  | -0.134563000 |
| F  | -1.292189000 | 3.119615000  | -1.401499000 |
| F  | -2.274344000 | 3.218549000  | 0.529224000  |
| F  | -0.109619000 | 3.141136000  | 0.426704000  |
| Cl | -3.079963000 | -2.037208000 | 0.986978000  |
| H  | 1.003373000  | 0.169288000  | -2.375660000 |
| H  | -3.219954000 | 1.109725000  | 1.021384000  |
| F  | -0.118522000 | -2.813054000 | 0.569481000  |
| F  | -1.203799000 | -2.853857000 | -1.315101000 |
| F  | 0.798197000  | -2.029429000 | -1.232072000 |
| C  | 2.247132000  | 0.398341000  | -0.384499000 |
| C  | 3.456946000  | -0.037709000 | -0.959003000 |
| C  | 2.226456000  | 0.530038000  | 1.018202000  |

|   |             |              |              |
|---|-------------|--------------|--------------|
| C | 4.587405000 | -0.317681000 | -0.183591000 |
| H | 3.514713000 | -0.164791000 | -2.038018000 |
| C | 3.347154000 | 0.246058000  | 1.806864000  |
| H | 1.316238000 | 0.863140000  | 1.513478000  |
| C | 4.537187000 | -0.178814000 | 1.207695000  |
| H | 5.504316000 | -0.650773000 | -0.663808000 |
| H | 3.291021000 | 0.357052000  | 2.887023000  |
| H | 5.410502000 | -0.400954000 | 1.814826000  |

END-----

Structure-----

**35**

|   |              |              |              |
|---|--------------|--------------|--------------|
| C | -2.119350000 | -0.190716000 | 0.104358000  |
| C | -1.583764000 | -1.427528000 | -0.280504000 |
| C | -2.271735000 | -2.625787000 | -0.097491000 |
| C | -3.534474000 | -2.543093000 | 0.486767000  |
| C | -4.078080000 | -1.303643000 | 0.868581000  |
| C | -3.385658000 | -0.105051000 | 0.686345000  |
| C | -0.029727000 | 0.128723000  | -0.807331000 |
| H | -1.840001000 | -3.574476000 | -0.394388000 |
| H | -4.106417000 | -3.450582000 | 0.650194000  |
| H | -5.064272000 | -1.271309000 | 1.320138000  |
| H | -3.824507000 | 0.834340000  | 0.989673000  |
| C | 0.558746000  | -2.232360000 | -1.325198000 |
| H | 1.053948000  | -2.719547000 | -0.481942000 |
| H | -0.038732000 | -2.961246000 | -1.874587000 |
| H | 1.300187000  | -1.791132000 | -1.986313000 |
| C | -1.185200000 | 2.168272000  | -0.039420000 |
| N | -0.325723000 | -1.178641000 | -0.833040000 |
| N | -1.121270000 | 0.754402000  | -0.237450000 |
| B | 1.370711000  | 0.765101000  | -1.292397000 |
| H | 1.301171000  | 1.975021000  | -1.263162000 |
| F | -1.114044000 | 2.840385000  | -1.204634000 |
| F | -0.186888000 | 2.608199000  | 0.749458000  |
| F | -2.343229000 | 2.503097000  | 0.549539000  |
| C | 2.570930000  | 0.213696000  | -0.349862000 |
| C | 3.823756000  | -0.132875000 | -0.891903000 |
| C | 2.430625000  | 0.076757000  | 1.046178000  |
| C | 4.882315000  | -0.578576000 | -0.091860000 |
| H | 3.974421000  | -0.055419000 | -1.966814000 |
| C | 3.477223000  | -0.373934000 | 1.858037000  |
| H | 1.480772000  | 0.326605000  | 1.515461000  |
| C | 4.712994000  | -0.703382000 | 1.291021000  |
| H | 5.835487000  | -0.835000000 | -0.548084000 |

|   |             |              |              |
|---|-------------|--------------|--------------|
| H | 3.328490000 | -0.468566000 | 2.931014000  |
| H | 5.529402000 | -1.054518000 | 1.916240000  |
| H | 1.531280000 | 0.401861000  | -2.447593000 |

END-----

Structure-----

**36**

|    |              |              |              |
|----|--------------|--------------|--------------|
| C  | -0.454840000 | -0.055092000 | 0.672671000  |
| C  | -1.912797000 | 1.464987000  | -0.122437000 |
| C  | -2.435499000 | 0.257171000  | -0.436753000 |
| N  | -0.712537000 | 1.262473000  | 0.553005000  |
| B  | 0.861548000  | -0.706688000 | 1.339171000  |
| H  | 0.943238000  | -0.252459000 | 2.470017000  |
| N  | -1.517622000 | -0.670774000 | 0.062097000  |
| C  | -1.674328000 | -2.091767000 | -0.067208000 |
| C  | 0.168067000  | 2.332485000  | 1.024072000  |
| H  | 0.907587000  | 1.895741000  | 1.689560000  |
| H  | 0.663453000  | 2.798945000  | 0.170076000  |
| H  | -0.422642000 | 3.071953000  | 1.565569000  |
| F  | -1.774286000 | -2.690480000 | 1.131059000  |
| F  | -0.643533000 | -2.644646000 | -0.725333000 |
| F  | -2.796090000 | -2.353852000 | -0.756107000 |
| C  | 2.176008000  | -0.322816000 | 0.470857000  |
| C  | 3.405934000  | -0.044119000 | 1.098326000  |
| C  | 2.164397000  | -0.274553000 | -0.937882000 |
| C  | 4.562585000  | 0.252980000  | 0.368334000  |
| H  | 3.459696000  | -0.057200000 | 2.185153000  |
| C  | 3.311061000  | 0.026261000  | -1.681206000 |
| H  | 1.237882000  | -0.476941000 | -1.472345000 |
| C  | 4.520149000  | 0.291179000  | -1.029340000 |
| H  | 5.493861000  | 0.461311000  | 0.889632000  |
| H  | 3.260997000  | 0.054587000  | -2.767060000 |
| H  | 5.413733000  | 0.526386000  | -1.601092000 |
| H  | -3.343976000 | -0.014626000 | -0.946696000 |
| Cl | -2.533817000 | 3.027847000  | -0.446620000 |
| H  | 0.705197000  | -1.909048000 | 1.404979000  |

END-----

Structure-----

**37**

|   |              |             |              |
|---|--------------|-------------|--------------|
| C | -0.820830000 | 0.374611000 | -0.492395000 |
| C | 0.492591000  | 2.129395000 | 0.067315000  |
| C | 1.273016000  | 1.028719000 | 0.157324000  |
| N | -0.764435000 | 1.707421000 | -0.330748000 |

|    |              |              |              |
|----|--------------|--------------|--------------|
| B  | -2.139429000 | -0.468029000 | -0.899224000 |
| H  | -1.822266000 | -1.610104000 | -1.164336000 |
| N  | 0.454572000  | -0.068334000 | -0.187060000 |
| C  | 0.830161000  | -1.453074000 | -0.302026000 |
| C  | -1.882965000 | 2.633257000  | -0.525598000 |
| H  | -2.388692000 | 2.805941000  | 0.426182000  |
| H  | -1.484588000 | 3.572401000  | -0.909972000 |
| H  | -2.576841000 | 2.201632000  | -1.243809000 |
| Cl | 2.926978000  | 0.984500000  | 0.607485000  |
| H  | 0.729511000  | 3.165626000  | 0.248967000  |
| F  | 0.715824000  | -1.881528000 | -1.572021000 |
| F  | 0.059918000  | -2.230901000 | 0.473505000  |
| F  | 2.100967000  | -1.636778000 | 0.074066000  |
| C  | -3.249108000 | -0.415503000 | 0.309545000  |
| H  | -3.581196000 | 0.616189000  | 0.497241000  |
| H  | -4.146644000 | -0.948310000 | -0.040803000 |
| C  | -2.796711000 | -1.033106000 | 1.641773000  |
| H  | -3.579361000 | -0.989517000 | 2.411646000  |
| H  | -2.517745000 | -2.086896000 | 1.518117000  |
| H  | -1.916806000 | -0.514513000 | 2.045144000  |
| H  | -2.575116000 | 0.074658000  | -1.910425000 |

END-----

Structure-----

**38**

|   |              |              |              |
|---|--------------|--------------|--------------|
| C | -0.374080000 | -0.686139000 | -0.019850000 |
| C | -0.404620000 | 0.673901000  | 0.016667000  |
| C | -1.637764000 | 1.515035000  | 0.029681000  |
| C | -2.838560000 | 0.625336000  | -0.355947000 |
| C | -2.808662000 | -0.736402000 | 0.358860000  |
| C | -1.572820000 | -1.576688000 | -0.028570000 |
| C | 1.767779000  | 0.046118000  | -0.001513000 |
| H | -1.791177000 | 1.950381000  | 1.026869000  |
| H | -3.769380000 | 1.151099000  | -0.119882000 |
| H | -2.800535000 | -0.571057000 | 1.444090000  |
| H | -1.446259000 | -2.409791000 | 0.672023000  |
| C | 1.293010000  | 2.516784000  | 0.054243000  |
| H | 0.971554000  | 3.001423000  | -0.871547000 |
| H | 0.813743000  | 3.009287000  | 0.903572000  |
| H | 2.373058000  | 2.594918000  | 0.149263000  |
| C | 1.458409000  | -2.426301000 | -0.054608000 |
| H | 1.695094000  | -2.759570000 | 0.959962000  |
| H | 0.690220000  | -3.073341000 | -0.477813000 |
| H | 2.355094000  | -2.483865000 | -0.671298000 |

|   |              |              |              |
|---|--------------|--------------|--------------|
| N | 0.918941000  | 1.107017000  | 0.032376000  |
| N | 0.967696000  | -1.052804000 | -0.040669000 |
| B | 3.371915000  | 0.012449000  | 0.007765000  |
| H | 3.744033000  | -0.716096000 | 0.920026000  |
| H | 3.765947000  | -0.467217000 | -1.050881000 |
| H | 3.835679000  | 1.127882000  | 0.150258000  |
| H | -1.545737000 | 2.354671000  | -0.668714000 |
| H | -2.825906000 | 0.460694000  | -1.441242000 |
| H | -3.716779000 | -1.301491000 | 0.125316000  |
| H | -1.710837000 | -2.019528000 | -1.024563000 |

END-----

Structure-----

**39**

|   |              |              |              |
|---|--------------|--------------|--------------|
| C | -0.001917000 | 0.786415000  | 0.000000000  |
| C | 0.699266000  | -1.354236000 | -0.000128000 |
| C | -0.661503000 | -1.368778000 | -0.000086000 |
| H | 1.402537000  | -2.169144000 | -0.000167000 |
| H | -1.348875000 | -2.197429000 | -0.000096000 |
| N | 1.087812000  | -0.022924000 | -0.000090000 |
| B | -0.066510000 | 2.386948000  | 0.000004000  |
| H | -0.685967000 | 2.754490000  | -0.991870000 |
| H | -0.685931000 | 2.754506000  | 0.991889000  |
| H | 1.051051000  | 2.864233000  | -0.000016000 |
| N | -1.074299000 | -0.046597000 | -0.000055000 |
| C | -2.466214000 | 0.437968000  | -0.000218000 |
| H | -2.590797000 | 1.072817000  | 0.881122000  |
| H | -2.591138000 | 1.071463000  | -0.882495000 |
| C | 2.480714000  | 0.469961000  | -0.000106000 |
| H | 2.606074000  | 1.101667000  | -0.882219000 |
| H | 2.606155000  | 1.101492000  | 0.882123000  |
| C | 3.509704000  | -0.649494000 | -0.000267000 |
| H | 4.505447000  | -0.196337000 | -0.000268000 |
| H | 3.426914000  | -1.280684000 | 0.889952000  |
| H | 3.426827000  | -1.280502000 | -0.890606000 |
| C | -3.491146000 | -0.684598000 | 0.000851000  |
| H | -4.489446000 | -0.237277000 | 0.000769000  |
| H | -3.404388000 | -1.316075000 | -0.888843000 |
| H | -3.403923000 | -1.314748000 | 0.891442000  |

END-----

Structure-----

**40**

|   |             |             |              |
|---|-------------|-------------|--------------|
| C | 0.160233000 | 1.600725000 | -0.007526000 |
|---|-------------|-------------|--------------|

|   |              |              |              |
|---|--------------|--------------|--------------|
| C | -0.726586000 | -0.482439000 | -0.159808000 |
| C | 0.596445000  | -0.620962000 | 0.158859000  |
| N | -0.969033000 | 0.892677000  | -0.256318000 |
| B | 0.391783000  | 3.188455000  | 0.008181000  |
| H | 0.698643000  | 3.530432000  | 1.146133000  |
| H | 1.326800000  | 3.458925000  | -0.736332000 |
| H | -0.608906000 | 3.783298000  | -0.341922000 |
| N | 1.116128000  | 0.672808000  | 0.246023000  |
| C | 2.503745000  | 1.011507000  | 0.545125000  |
| H | 3.050814000  | 1.231668000  | -0.375466000 |
| H | 2.527513000  | 1.886067000  | 1.195251000  |
| H | 2.978237000  | 0.174927000  | 1.055611000  |
| C | -2.275838000 | 1.474672000  | -0.550325000 |
| H | -2.877397000 | 1.541609000  | 0.359956000  |
| H | -2.135819000 | 2.470381000  | -0.964062000 |
| H | -2.793807000 | 0.850923000  | -1.279156000 |
| C | 1.413180000  | -1.858999000 | 0.346498000  |
| H | 2.014254000  | -1.772532000 | 1.259300000  |
| H | 0.723555000  | -2.691557000 | 0.511964000  |
| C | 2.326092000  | -2.181816000 | -0.848385000 |
| H | 3.041613000  | -1.375250000 | -1.037526000 |
| H | 2.892954000  | -3.099098000 | -0.656253000 |
| H | 1.733662000  | -2.328502000 | -1.757766000 |
| C | -1.781146000 | -1.525686000 | -0.349246000 |
| H | -2.367351000 | -1.301046000 | -1.247904000 |
| H | -1.277513000 | -2.477354000 | -0.542089000 |
| C | -2.722068000 | -1.683522000 | 0.857230000  |
| H | -3.262683000 | -0.756160000 | 1.070978000  |
| H | -3.460820000 | -2.468380000 | 0.662294000  |
| H | -2.156675000 | -1.959891000 | 1.753617000  |

END-----

Structure-----

**41**

|   |              |              |              |
|---|--------------|--------------|--------------|
| C | -0.516200000 | -0.686474000 | -0.000077000 |
| C | -0.529540000 | 0.718819000  | 0.000022000  |
| C | -1.744665000 | 1.393193000  | 0.000124000  |
| C | -2.883596000 | 0.581763000  | 0.000086000  |
| C | 1.618604000  | 0.039902000  | -0.000085000 |
| H | -1.808854000 | 2.475665000  | 0.000236000  |
| H | -3.872503000 | 1.026730000  | 0.000163000  |
| C | 1.198678000  | 2.528774000  | -0.000123000 |
| H | 0.802560000  | 3.019235000  | -0.892738000 |
| H | 0.802581000  | 3.019525000  | 0.892344000  |

|   |              |              |              |
|---|--------------|--------------|--------------|
| H | 2.283790000  | 2.585531000  | -0.000128000 |
| C | 1.298947000  | -2.442328000 | 0.000105000  |
| H | 1.900608000  | -2.626997000 | 0.892058000  |
| H | 0.430356000  | -3.099655000 | -0.000378000 |
| H | 1.901545000  | -2.626953000 | -0.891213000 |
| N | 0.798302000  | 1.125141000  | 0.000092000  |
| N | 0.819607000  | -1.064510000 | -0.000159000 |
| B | 3.214606000  | -0.024294000 | 0.000091000  |
| H | 3.559461000  | -0.653988000 | 0.990551000  |
| H | 3.559760000  | -0.654634000 | -0.989858000 |
| H | 3.709174000  | 1.083096000  | -0.000234000 |
| C | -2.761498000 | -0.817463000 | -0.000043000 |
| H | -3.652737000 | -1.438095000 | -0.000061000 |
| N | -1.585501000 | -1.472790000 | -0.000112000 |

END-----

Structure-----

**42**

|   |              |              |              |
|---|--------------|--------------|--------------|
| C | 0.000076000  | 0.231625000  | 0.143104000  |
| C | -0.677469000 | -1.679537000 | -0.878567000 |
| C | 0.677280000  | -1.679454000 | -0.878924000 |
| H | -1.391660000 | -2.382112000 | -1.276344000 |
| H | 1.391389000  | -2.382089000 | -1.276738000 |
| N | -1.076967000 | -0.499312000 | -0.255836000 |
| B | 0.000577000  | 1.602035000  | 0.977085000  |
| H | 1.005056000  | 1.639280000  | 1.665149000  |
| H | 0.000855000  | 2.555716000  | 0.210243000  |
| H | -1.003529000 | 1.639971000  | 1.665581000  |
| N | 1.076902000  | -0.499222000 | -0.256272000 |
| C | -2.451362000 | -0.137495000 | -0.073354000 |
| C | -2.920592000 | 1.081735000  | -0.564592000 |
| C | -3.306214000 | -1.035239000 | 0.568861000  |
| C | -4.267276000 | 1.409472000  | -0.397417000 |
| H | -2.240761000 | 1.758342000  | -1.069624000 |
| C | -4.653985000 | -0.702236000 | 0.723023000  |
| H | -2.917618000 | -1.974790000 | 0.948197000  |
| C | -5.135280000 | 0.519931000  | 0.244139000  |
| H | -4.637735000 | 2.357409000  | -0.775103000 |
| H | -5.323022000 | -1.395173000 | 1.223696000  |
| H | -6.182524000 | 0.777772000  | 0.368891000  |
| C | 2.451341000  | -0.137574000 | -0.073704000 |
| C | 2.920992000  | 1.080990000  | -0.566146000 |
| C | 3.305617000  | -1.034772000 | 0.569975000  |
| C | 4.267670000  | 1.408628000  | -0.398659000 |

|   |             |              |              |
|---|-------------|--------------|--------------|
| H | 2.241451000 | 1.757212000  | -1.072111000 |
| C | 4.653389000 | -0.701893000 | 0.724419000  |
| H | 2.916546000 | -1.973747000 | 0.950254000  |
| C | 5.135169000 | 0.519606000  | 0.244327000  |
| H | 4.638551000 | 2.356063000  | -0.777190000 |
| H | 5.322028000 | -1.394385000 | 1.226242000  |
| H | 6.182404000 | 0.777385000  | 0.369283000  |

END-----

Structure-----

**43**

|   |              |              |              |
|---|--------------|--------------|--------------|
| C | 0.279352000  | -0.000030000 | 0.306549000  |
| C | 2.330311000  | -0.680225000 | -0.348571000 |
| C | 2.330138000  | 0.680736000  | -0.348543000 |
| H | 3.101084000  | -1.392709000 | -0.596097000 |
| H | 3.100658000  | 1.393513000  | -0.595998000 |
| N | 1.064334000  | -1.077164000 | 0.051166000  |
| B | -1.267852000 | -0.000344000 | 0.747722000  |
| H | -1.466421000 | 0.998097000  | 1.435705000  |
| H | -1.466142000 | -0.999239000 | 1.435075000  |
| N | 1.064019000  | 1.077297000  | 0.051211000  |
| C | 0.642773000  | 2.470020000  | 0.188447000  |
| H | -0.285855000 | 2.633975000  | -0.359122000 |
| H | 0.492230000  | 2.717554000  | 1.241394000  |
| H | 1.425635000  | 3.104863000  | -0.226759000 |
| C | 0.643508000  | -2.470021000 | 0.188319000  |
| H | 0.493289000  | -2.717768000 | 1.241269000  |
| H | -0.285208000 | -2.634183000 | -0.359033000 |
| H | 1.426465000  | -3.104566000 | -0.227150000 |
| C | -2.250436000 | 0.000019000  | -0.567770000 |
| H | -2.040791000 | 0.875757000  | -1.203378000 |
| H | -2.040666000 | -0.875225000 | -1.204013000 |
| C | -3.743563000 | -0.000230000 | -0.207030000 |
| H | -4.004578000 | 0.881770000  | 0.392902000  |
| H | -4.396976000 | 0.000024000  | -1.090734000 |
| H | -4.004438000 | -0.882698000 | 0.392281000  |

END-----

Structure-----

**44**

|   |              |              |              |
|---|--------------|--------------|--------------|
| C | -0.949769000 | 0.095471000  | -0.620334000 |
| C | 1.140948000  | 0.728711000  | -0.058215000 |
| C | 1.114310000  | -0.674489000 | -0.137650000 |
| N | -0.141185000 | 1.160476000  | -0.363984000 |



|          |              |              |              |
|----------|--------------|--------------|--------------|
| B        | -2.525980000 | 0.152246000  | -0.928516000 |
| H        | -2.857014000 | -0.914261000 | -1.426038000 |
| H        | -2.715902000 | 1.053532000  | -1.739405000 |
| N        | -0.186022000 | -1.024382000 | -0.482505000 |
| C        | -0.545881000 | 2.562510000  | -0.358584000 |
| H        | 0.198318000  | 3.149833000  | -0.900700000 |
| H        | -1.511162000 | 2.651606000  | -0.851363000 |
| H        | -0.618944000 | 2.925771000  | 0.669774000  |
| C        | -0.640525000 | -2.400556000 | -0.671666000 |
| H        | -1.481853000 | -2.610276000 | -0.011816000 |
| H        | -0.937185000 | -2.559321000 | -1.709638000 |
| H        | 0.191929000  | -3.058610000 | -0.424789000 |
| C        | -3.352375000 | 0.439570000  | 0.464082000  |
| H        | -4.420137000 | 0.543208000  | 0.216693000  |
| H        | -3.056352000 | 1.409053000  | 0.894618000  |
| C        | -3.196840000 | -0.645305000 | 1.541475000  |
| H        | -2.147510000 | -0.764048000 | 1.842382000  |
| H        | -3.770738000 | -0.422514000 | 2.451680000  |
| H        | -3.536411000 | -1.621360000 | 1.171798000  |
| C        | 2.325573000  | 1.374041000  | 0.277052000  |
| C        | 3.421890000  | 0.538066000  | 0.510473000  |
| C        | 3.290393000  | -0.856276000 | 0.403643000  |
| H        | 2.396823000  | 2.453218000  | 0.355242000  |
| H        | 4.148185000  | -1.496276000 | 0.588290000  |
| H        | 4.384395000  | 0.960125000  | 0.777873000  |
| N        | 2.143938000  | -1.483432000 | 0.080249000  |
| END----- |              |              |              |
